# Supplementary material for: Predictors of Gull-billed tern (Gelochelidon nilotica) nest survival in artificial coastal saltpans, Bohai Bay, China
Source: PeerJ. 2020 Oct 5;8:e10054. doi: 10.7717/peerj.10054 (PMC7543726; doi:10.7717/peerj.10054)
Supplement: Data S1 [file peerj-08-10054-s001.xlsx]

## Sheet: Raw data
Descriptive headings	Nest number		The day the nest was found	The last day the nest was checked when alive	The last day the nest was checked	The fate of the nest (0 = successful, 1 = unsuccessful)	Number of nests with this encounter history	Nest age since estimated initiation	Clutch size	Substrate of the nest	Substrate of the nest	Substrate of the nest	Nest habitat type	Nest habitat type	Nest habitat type	Nearest-neighbor distance to a conspecific nest	Relative height of the nest site above the water	Relative height of the nest site above the water	Density of Gull-billed Tern nests within a 100 m radius	Nearest distance between the nest and the road	Nearest distance between the nest and water edge	Year	Year
	ID		i	j	k	s	Samefate	ageday1	Eggs	mud	shell	fea	pond	Way	Island	Disnest	M	L	Nest100	Disroad	Diswater	2017	2018
/*	1	*/	11	29	29	0	1	2	2	1	0	0	0	0	1	16.3436	0	1	74	745.641	9.86586	1	0	;
/*	2	*/	11	33	33	0	1	2	2	1	0	0	0	0	1	6.26538	1	0	74	627.307	16.4583	1	0	;
/*	3	*/	11	29	29	0	1	1	3	0	0	1	0	0	1	16.6262	1	0	74	611.083	22.2246	1	0	;
/*	4	*/	11	31	31	0	1	1	2	1	0	0	0	0	1	6.26538	1	0	74	631.391	18.2274	1	0	;
/*	5	*/	11	33	33	0	1	1	2	1	0	0	0	0	1	16.765	1	0	74	577.067	22.8456	1	0	;
/*	6	*/	11	31	31	0	1	0	3	1	0	0	0	0	1	13.1374	0	1	74	677.709	18.887	1	0	;
/*	7	*/	11	32	32	0	1	0	3	1	0	0	0	0	1	11.0099	0	1	64	446.256	14.6165	1	0	;
/*	8	*/	11	33	33	0	1	0	2	1	0	0	0	0	1	13.5875	0	1	67	530.529	14.0922	1	0	;
/*	9	*/	11	32	32	0	1	-2	2	1	0	0	0	0	1	9.14054	1	0	71	631.883	36.5127	1	0	;
/*	10	*/	11	31	31	0	1	-2	2	1	0	0	0	0	1	5.26999	1	0	74	528.171	23.7882	1	0	;
/*	11	*/	11	31	31	0	1	-2	3	1	0	0	0	0	1	6.01514	1	0	74	859.993	10.6163	1	0	;
/*	12	*/	11	32	32	0	1	-2	3	1	0	0	0	0	1	6.71268	1	0	72	848.184	12.3212	1	0	;
/*	13	*/	11	31	31	0	1	-2	3	1	0	0	0	0	1	3.85256	1	0	72	849.489	18.3562	1	0	;
/*	14	*/	11	34	34	0	1	-2	2	1	0	0	0	0	1	6.82557	0	1	72	687.863	12.2128	1	0	;
/*	15	*/	11	31	31	0	1	-2	3	1	0	0	0	0	1	5.33163	0	1	74	761.887	26.7723	1	0	;
/*	16	*/	11	33	33	0	1	-3	2	1	0	0	0	0	1	39.5684	1	0	72	511.346	24.6636	1	0	;
/*	17	*/	11	32	32	0	1	-3	2	1	0	0	0	0	1	15.6191	0	1	77	465.284	9.97301	1	0	;
/*	18	*/	11	32	32	0	1	-3	3	1	0	0	0	0	1	7.8272	1	0	78	855.407	7.99835	1	0	;
/*	19	*/	11	29	29	0	1	-3	3	1	0	0	0	0	1	9.65164	0	1	78	786.36	8.8957	1	0	;
/*	20	*/	11	29	29	0	1	-3	2	1	0	0	0	0	1	9.65164	0	1	78	778.7	9.88836	1	0	;
/*	21	*/	11	32	32	0	1	-3	3	1	0	0	0	0	1	11.0099	0	1	74	446.573	6.00551	1	0	;
/*	22	*/	11	32	32	0	1	-3	3	1	0	0	0	0	1	3.85256	1	0	74	851.625	18.3138	1	0	;
/*	23	*/	11	33	33	0	1	-3	2	1	0	0	0	0	1	39.5684	0	1	74	494.178	4.37318	1	0	;
/*	24	*/	11	32	32	0	1	-4	2	1	0	0	0	0	1	2.4005	1	0	74	870.319	9.1918	1	0	;
/*	25	*/	11	36	38	1	1	-4	2	1	0	0	0	0	1	22.5591	1	0	74	550.701	33.8377	1	0	;
/*	26	*/	19	40	40	0	1	-4	2	1	0	0	0	0	1	13.7009	0	1	74	769.277	12.2974	1	0	;
/*	27	*/	19	39	39	0	1	-4	2	1	0	0	0	0	1	13.3106	1	0	72	559.813	17.9932	1	0	;
/*	28	*/	19	38	38	0	1	-4	3	1	0	0	0	0	1	10.9913	0	1	72	676.917	7.38596	1	0	;
/*	29	*/	19	38	38	0	1	-4	2	1	0	0	0	0	1	6.72708	1	0	72	857.879	17.2653	1	0	;
/*	30	*/	19	39	39	0	1	-5	2	1	0	0	0	0	1	2.74447	0	1	74	774.546	25.3732	1	0	;
/*	31	*/	19	31	33	1	1	-5	2	1	0	0	0	0	1	12.8729	0	1	74	728.467	20.7671	1	0	;
/*	32	*/	19	40	40	0	1	-5	1	1	0	0	0	0	1	5.44957	0	1	77	867.984	18.0416	1	0	;
/*	33	*/	19	47	47	0	1	-5	2	1	0	0	0	0	1	2.74447	0	1	80	772.089	25.6633	1	0	;
/*	34	*/	19	47	49	1	1	-5	2	1	0	0	0	0	1	0.671539	0	1	80	766.528	27.0181	1	0	;
/*	35	*/	19	39	39	0	1	-5	3	1	0	0	0	0	1	15.6191	1	0	80	478.806	24.318	1	0	;
/*	36	*/	19	32	32	0	1	-6	2	1	0	0	0	0	1	16.765	1	0	80	591.859	21.2462	1	0	;
/*	37	*/	19	43	43	0	1	-6	2	1	0	0	0	0	1	11.881	1	0	79	586.443	22.2631	1	0	;
/*	38	*/	19	44	44	0	1	-6	1	1	0	0	0	0	1	3.67687	1	0	80	864.105	11.4149	1	0	;
/*	39	*/	19	47	49	1	1	-6	2	1	0	0	0	0	1	3.67687	1	0	78	864.727	13.4762	1	0	;
/*	40	*/	19	37	37	0	1	-6	1	1	0	0	0	0	1	6.82557	0	1	78	693.007	18.7172	1	0	;
/*	41	*/	19	43	43	0	1	-6	2	1	0	0	0	0	1	20.0857	0	1	74	786.615	32.4185	1	0	;
/*	42	*/	19	37	37	0	1	-7	2	1	0	0	0	0	1	18.4643	0	1	74	658.024	16.3836	1	0	;
/*	43	*/	19	39	39	0	1	-7	2	1	0	0	0	0	1	10.0603	1	0	77	647.863	46.1359	1	0	;
/*	44	*/	19	39	39	0	1	-8	2	1	0	0	0	0	1	14.3527	1	0	74	509.561	18.1838	1	0	;
/*	45	*/	19	40	40	0	1	-8	2	1	0	0	0	0	1	7.64388	0	1	68	856.857	29.4903	1	0	;
/*	46	*/	27	43	43	0	1	-8	2	1	0	0	0	0	1	5.44957	0	1	73	867.831	16.8033	1	0	;
/*	47	*/	27	46	46	0	1	-9	3	1	0	0	0	0	1	11.1207	1	0	74	521.812	31.2835	1	0	;
/*	48	*/	27	45	45	0	1	-9	1	1	0	0	0	0	1	37.1307	0	1	74	845.238	18.9905	1	0	;
/*	49	*/	27	40	40	0	1	-9	3	1	0	0	0	0	1	19.4639	0	1	79	828.995	56.1505	1	0	;
/*	50	*/	27	44	44	0	1	4	2	1	0	0	0	0	1	25.1286	0	1	78	883.681	6.99438	1	0	;
/*	51	*/	27	31	31	0	1	-9	3	1	0	0	0	0	1	10.4509	1	0	72	635.497	46.6763	1	0	;
/*	52	*/	27	47	47	0	1	-9	3	1	0	0	0	0	1	9.14054	1	0	71	639.624	36.762	1	0	;
/*	53	*/	27	49	49	0	1	-9	2	1	0	0	0	0	1	16.3436	0	1	72	759.992	8.29123	1	0	;
/*	54	*/	27	46	46	0	1	-10	2	1	0	0	0	0	1	15.7468	0	1	68	471.477	2.05611	1	0	;
/*	55	*/	27	44	44	0	1	-11	2	1	0	0	0	0	1	5.26999	1	0	72	523.516	23.1893	1	0	;
/*	56	*/	27	38	40	1	1	-11	2	1	0	0	0	0	1	9.14909	1	0	71	572.892	23.296	1	0	;
/*	57	*/	27	46	46	0	1	-12	1	1	0	0	0	0	1	7.64388	0	1	80	856.343	31.7179	1	0	;
/*	58	*/	40	44	46	1	1	-13	3	1	0	0	0	0	1	14.3865	0	1	74	842.606	27.1266	1	0	;
/*	59	*/	27	46	46	0	1	-14	2	1	0	0	0	0	1	16.0961	0	1	77	593.669	14.4287	1	0	;
/*	60	*/	27	46	49	1	1	-14	3	1	0	0	0	0	1	12.8729	0	1	76	738.59	33.02	1	0	;
/*	61	*/	29	49	49	0	1	-15	2	1	0	0	0	0	1	10.5729	0	1	78	868.579	16.5407	1	0	;
/*	62	*/	21	49	49	0	1	-15	3	1	0	0	0	0	1	12.3481	1	0	71	530.658	43.393	1	0	;
/*	63	*/	27	39	39	0	1	-17	2	1	0	0	0	0	1	0.671539	0	1	80	766.553	26.4388	1	0	;
/*	64	*/	27	38	38	0	1	-19	2	1	0	0	0	0	1	17.3093	0	1	77	664.678	54.264	1	0	;
/*	65	*/	27	43	43	0	1	-19	2	1	0	0	0	0	1	30.8832	0	1	64	559.618	11.5725	1	0	;
/*	66	*/	27	34	34	0	1	-23	2	1	0	0	0	0	1	27.1931	0	1	65	736.187	54.6218	1	0	;
/*	67	*/	27	37	37	0	1	2	2	1	0	0	0	0	1	12.8441	0	1	32	808.729	17.01	1	0	;
/*	68	*/	27	36	36	0	1	-5	3	1	0	0	0	0	1	50.8287	0	1	44	414.664	22.2937	1	0	;
/*	69	*/	27	32	37	1	1	-3	3	1	0	0	0	0	1	16.4873	0	1	45	491.567	7.89064	1	0	;
/*	70	*/	27	29	29	0	1	-5	2	1	0	0	0	0	1	8.08116	0	1	18	503.297	17.2758	1	0	;
/*	71	*/	14	33	33	0	1	-3	3	0	1	0	0	0	1	6.69041	0	0	8	226.242	2.79	0	1	;
/*	72	*/	14	38	38	0	1	-10	3	0	0	0	0	0	1	2.96267	1	0	8	217.251	1.77	0	1	;
/*	73	*/	14	32	33	1	1	-12	3	0	0	0	0	0	1	2.42083	0	0	8	219.876	4.26	0	1	;
/*	74	*/	14	23	26	1	1	-10	2	0	1	0	0	0	1	2.96267	0	0	8	216.609	0.87	0	1	;
/*	75	*/	14	38	38	0	1	-12	3	0	1	0	0	0	1	2.55422	0	0	8	221.532	5.83	0	1	;
/*	76	*/	11	33	35	1	1	-10	1	0	0	0	0	0	1	2.42083	0	0	8	221.771	1.99	0	1	;
/*	77	*/	10	32	35	1	1	-6	2	0	1	0	0	1	0	82.5352	0	0	2	850.967	7.13025	0	1	;
/*	78	*/	10	39	40	1	1	-8	1	0	1	0	0	1	0	46.1135	0	0	3	740.37	11.1725	0	1	;
/*	79	*/	16	37	37	0	1	-14	3	0	1	0	0	1	0	6.68561	0	0	9	976.819	0.703564	0	1	;
/*	80	*/	16	43	43	0	1	-12	3	0	0	0	0	1	0	117.739	0	1	1	602.969	11.4424	0	1	;
/*	81	*/	22	43	43	0	1	-6	2	0	0	0	0	1	0	12.2363	0	0	9	985.908	0.289833	0	1	;
/*	82	*/	22	32	35	1	1	-20	1	1	0	0	0	1	0	7.29899	0	0	10	1011.29	8.55376	0	1	;
/*	83	*/	10	33	33	0	1	-6	2	0	1	0	0	1	0	46.1135	0	0	3	701.227	10.3717	0	1	;
/*	84	*/	35	56	56	0	1	-33	2	0	0	0	0	1	0	51.4167	0	1	4	781.111	6.97577	0	1	;
/*	85	*/	35	56	56	0	1	-31	2	0	0	0	0	1	0	6.68561	0	0	9	974.088	3.92004	0	1	;
/*	86	*/	35	40	43	1	1	-31	2	0	0	0	0	1	0	3.34304	0	0	10	1017.39	10.9385	0	1	;
/*	87	*/	35	40	40	0	1	-12	2	0	0	1	0	1	0	10.8552	0	0	10	1025.05	11.8744	0	1	;
/*	88	*/	35	43	46	1	1	-18	2	0	0	1	0	1	0	9.09238	0	1	11	1054.35	6.83906	0	1	;
/*	89	*/	35	46	46	0	1	-18	2	0	0	1	0	1	0	9.09238	0	0	11	1048.18	29.7155	0	1	;
/*	90	*/	35	43	43	0	1	-15	2	0	0	1	0	1	0	43.0626	0	0	10	1086	31.5502	0	1	;
/*	91	*/	35	48	48	0	1	-22	1	0	0	1	0	1	0	14.4672	0	0	6	1121.5	23.9637	0	1	;
/*	92	*/	35	38	41	1	1	-33	1	0	0	1	0	1	0	14.4672	0	0	5	1133.91	24.818	0	1	;
/*	93	*/	35	37	39	1	1	-33	1	0	0	1	0	1	0	15.0449	1	0	6	1147.45	25.9934	0	1	;
/*	94	*/	35	60	60	0	1	-31	2	0	0	0	0	1	0	10.4377	0	0	3	1230.46	28.5484	0	1	;
/*	95	*/	43	50	54	1	1	-39	2	0	0	0	0	1	0	10.42	1	0	9	800.8	29.2992	0	1	;
/*	96	*/	4	25	25	0	1	2	2	1	0	0	0	0	0	6.26538	1	0	18	627.307	16.4583	0	1	;
/*	97	*/	7	25	25	0	1	2	2	1	0	0	1	0	0	16.3436	0	1	19	745.641	9.86586	0	1	;
/*	98	*/	1	22	22	0	1	1	3	0	0	1	0	0	0	16.6262	1	0	22	611.083	22.2246	0	1	;
/*	99	*/	1	25	25	0	1	1	2	1	0	0	0	0	0	6.26538	1	0	18	631.391	18.2274	0	1	;
/*	100	*/	7	25	25	0	1	1	2	1	0	0	0	0	0	16.765	1	0	20	577.067	22.8456	0	1	;
/*	101	*/	14	26	26	0	1	0	3	1	0	0	1	0	0	13.1374	0	1	25	677.709	18.887	0	1	;
/*	102	*/	22	26	26	0	1	0	3	1	0	0	1	0	0	11.0099	0	1	12	446.256	14.6165	0	1	;
/*	103	*/	22	25	25	0	1	0	2	1	0	0	1	0	0	13.5875	0	1	23	530.529	14.0922	0	1	;
/*	104	*/	14	30	30	0	1	-2	2	1	0	0	0	0	0	9.14054	1	0	21	631.883	36.5127	0	1	;
/*	105	*/	14	26	26	0	1	-2	2	1	0	0	0	0	0	5.26999	1	0	23	528.171	23.7882	0	1	;
/*	106	*/	18	27	27	0	1	-2	3	1	0	0	0	0	0	6.01514	0	1	31	859.993	10.6163	0	1	;
/*	107	*/	18	29	29	0	1	-2	3	1	0	0	0	0	0	6.71268	0	1	37	848.184	12.3212	0	1	;
/*	108	*/	18	26	26	0	1	-2	3	1	0	0	0	0	0	3.85256	0	1	36	849.489	18.3562	0	1	;
/*	109	*/	14	27	27	0	1	-2	2	1	0	0	1	0	0	6.82557	0	1	28	687.863	12.2128	0	1	;
/*	110	*/	4	14	18	1	1	-2	3	1	0	0	1	0	0	5.33163	0	1	17	761.887	26.7723	0	1	;
/*	111	*/	4	27	27	0	1	-3	2	1	0	0	0	0	0	39.5684	0	1	16	511.346	24.6636	0	1	;
/*	112	*/	14	29	29	0	1	-3	2	1	0	0	1	0	0	15.6191	0	1	15	465.284	9.97301	0	1	;
/*	113	*/	18	29	29	0	1	-3	3	1	0	0	0	0	0	7.8272	0	1	37	855.407	7.99835	0	1	;
/*	114	*/	18	32	32	0	1	-3	3	1	0	0	1	0	0	9.65164	0	1	42	786.36	8.8957	0	1	;
/*	115	*/	18	29	29	0	1	-3	2	1	0	0	1	0	0	9.65164	0	1	43	778.7	9.88836	0	1	;
/*	116	*/	22	30	30	0	1	-3	3	1	0	0	1	0	0	11.0099	0	1	14	446.573	6.00551	0	1	;
/*	117	*/	18	30	30	0	1	-3	3	1	0	0	0	0	0	3.85256	0	1	34	851.625	18.3138	0	1	;
/*	118	*/	7	28	28	0	1	-3	2	1	0	0	1	0	0	39.5684	0	1	7	494.178	4.37318	0	1	;
/*	119	*/	22	30	30	0	1	-4	2	1	0	0	0	0	0	2.4005	0	1	25	870.319	9.1918	0	1	;
/*	120	*/	26	30	30	0	1	-4	2	1	0	0	0	0	0	22.5591	0	1	24	550.701	33.8377	0	1	;
/*	121	*/	18	29	29	0	1	-4	2	1	0	0	1	0	0	13.7009	0	1	39	769.277	12.2974	0	1	;
/*	122	*/	26	30	30	0	1	-4	2	1	0	0	0	0	0	13.3106	1	0	25	559.813	17.9932	0	1	;
/*	123	*/	14	28	28	0	1	-4	3	1	0	0	1	0	0	10.9913	0	1	26	676.917	7.38596	0	1	;
/*	124	*/	18	29	29	0	1	-4	2	1	0	0	0	0	0	6.72708	1	0	27	857.879	17.2653	0	1	;
/*	125	*/	7	30	30	0	1	-5	2	1	0	0	1	0	0	2.74447	0	1	18	774.546	25.3732	0	1	;
/*	126	*/	18	30	30	0	1	-5	2	1	0	0	1	0	0	12.8729	0	1	26	728.467	20.7671	0	1	;
/*	127	*/	7	14	18	1	1	-5	1	1	0	0	1	0	0	5.44957	0	1	25	867.984	18.0416	0	1	;
/*	128	*/	7	14	18	1	1	-5	2	1	0	0	1	0	0	2.74447	0	1	17	772.089	25.6633	0	1	;
/*	129	*/	7	14	18	1	1	-5	2	1	0	0	1	0	0	0.671539	0	1	17	766.528	27.0181	0	1	;
/*	130	*/	14	29	29	0	1	-5	3	1	0	0	0	0	0	15.6191	1	0	16	478.806	24.318	0	1	;
/*	131	*/	10	32	32	0	1	-6	2	1	0	0	0	0	0	16.765	1	0	21	591.859	21.2462	0	1	;
/*	132	*/	14	33	33	0	1	-6	2	1	0	0	0	0	0	11.881	1	0	26	586.443	22.2631	0	1	;
/*	133	*/	18	30	30	0	1	-6	1	1	0	0	0	0	0	3.67687	1	0	27	864.105	11.4149	0	1	;
/*	134	*/	18	30	30	0	1	-6	2	1	0	0	0	0	0	3.67687	1	0	27	864.727	13.4762	0	1	;
/*	135	*/	14	30	30	0	1	-6	1	1	0	0	1	0	0	6.82557	0	1	26	693.007	18.7172	0	1	;
/*	136	*/	10	14	18	1	1	-6	2	1	0	0	1	0	0	20.0857	0	1	23	786.615	32.4185	0	1	;
/*	137	*/	14	32	32	0	1	-7	2	1	0	0	1	0	0	18.4643	0	1	22	658.024	16.3836	0	1	;
/*	138	*/	14	31	31	0	1	-7	2	1	0	0	0	0	0	10.0603	1	0	21	647.863	46.1359	0	1	;
/*	139	*/	14	32	32	0	1	-8	2	1	0	0	0	0	0	14.3527	1	0	21	509.561	18.1838	0	1	;
/*	140	*/	10	14	18	1	1	-8	2	1	0	0	1	0	0	7.64388	0	1	26	856.857	29.4903	0	1	;
/*	141	*/	10	14	18	1	1	-8	2	1	0	0	1	0	0	5.44957	0	1	25	867.831	16.8033	0	1	;
/*	142	*/	14	44	47	1	1	-9	3	1	0	0	0	0	0	11.1207	1	0	22	521.812	31.2835	0	1	;
/*	143	*/	10	14	18	1	1	-9	1	1	0	0	1	0	0	37.1307	0	1	29	845.238	18.9905	0	1	;
/*	144	*/	14	15	18	1	1	-9	3	1	0	0	1	0	0	19.4639	0	1	29	828.995	56.1505	0	1	;
/*	145	*/	14	15	18	1	1	4	2	1	0	0	1	0	0	25.1286	0	1	24	883.681	6.99438	0	1	;
/*	146	*/	14	35	35	0	1	-9	3	1	0	0	0	0	0	10.4509	1	0	21	635.497	46.6763	0	1	;
/*	147	*/	22	35	35	0	1	-9	3	1	0	0	0	0	0	9.14054	1	0	19	639.624	36.762	0	1	;
/*	148	*/	14	18	22	1	1	-9	2	1	0	0	1	0	0	16.3436	0	1	15	759.992	8.29123	0	1	;
/*	149	*/	14	35	35	0	1	-10	2	1	0	0	1	0	0	15.7468	0	1	16	471.477	2.05611	0	1	;
/*	150	*/	14	24	26	1	1	-11	2	1	0	0	0	0	0	5.26999	1	0	23	523.516	23.1893	0	1	;
/*	151	*/	12	36	38	1	1	-11	2	1	0	0	0	0	0	9.14909	1	0	25	572.892	23.296	0	1	;
/*	152	*/	14	15	18	1	1	-12	1	1	0	0	1	0	0	7.64388	0	1	26	856.343	31.7179	0	1	;
/*	153	*/	18	41	43	1	1	-13	3	1	0	0	1	0	0	14.3865	0	1	31	842.606	27.1266	0	1	;
/*	154	*/	22	38	38	0	1	-14	2	1	0	0	1	0	0	16.0961	0	1	26	593.669	14.4287	0	1	;
/*	155	*/	18	38	38	0	1	-14	3	1	0	0	1	0	0	12.8729	0	1	22	738.59	33.02	0	1	;
/*	156	*/	18	40	40	0	1	-15	2	1	0	0	1	0	0	10.5729	0	1	25	868.579	16.5407	0	1	;
/*	157	*/	26	44	44	0	1	-15	3	1	0	0	0	0	0	12.3481	1	0	22	530.658	43.393	0	1	;
/*	158	*/	22	31	33	1	1	-17	2	1	0	0	1	0	0	0.671539	0	1	17	766.553	26.4388	0	1	;
/*	159	*/	33	44	44	0	1	-19	2	1	0	0	1	0	0	17.3093	0	1	21	664.678	54.264	0	1	;
/*	160	*/	22	45	45	0	1	-19	2	1	0	0	1	0	0	30.8832	0	1	18	559.618	11.5725	0	1	;
/*	161	*/	24	46	46	0	1	-23	2	1	0	0	1	0	0	27.1931	0	1	21	736.187	54.6218	0	1	;
/*	162	*/	22	30	30	0	1	2	2	1	0	0	1	0	0	12.8441	0	1	38	808.729	17.01	0	1	;
/*	163	*/	7	28	28	0	1	-5	3	1	0	0	1	0	0	50.8287	0	1	10	414.664	22.2937	0	1	;
/*	164	*/	7	27	27	0	1	-3	3	1	0	0	1	0	0	16.4873	0	1	20	491.567	7.89064	0	1	;
/*	165	*/	7	30	30	0	1	-5	2	1	0	0	1	0	0	8.08116	0	1	15	503.297	17.2758	0	1	;
/*	166	*/	7	28	28	0	1	-5	3	0	1	0	1	0	0	24.5402	0	1	14	515.58	32.1743	0	1	;
/*	167	*/	7	30	30	0	1	-5	2	1	0	0	1	0	0	14.5144	0	1	18	548.462	11.4491	0	1	;
/*	168	*/	7	30	30	0	1	-5	2	1	0	0	1	0	0	6.2157	0	1	18	556.206	27.0557	0	1	;
/*	169	*/	7	24	24	0	1	1	2	1	0	0	1	0	0	19.0971	0	1	20	575.749	3.72291	0	1	;
/*	170	*/	7	26	26	0	1	0	2	1	0	0	1	0	0	15.3633	0	1	23	598.43	10.3292	0	1	;
/*	171	*/	7	28	28	0	1	-2	2	1	0	0	1	0	0	13.955	0	1	27	611.728	9.42757	0	1	;
/*	172	*/	7	26	26	0	1	-1	3	1	0	0	1	0	0	24.5056	0	1	31	653.211	7.42696	0	1	;
/*	173	*/	7	27	27	0	1	-2	3	1	0	0	1	0	0	15.4918	0	1	30	658.535	24.2894	0	1	;
/*	174	*/	7	25	25	0	1	2	3	1	0	0	1	0	0	12.3692	0	1	30	674.009	15.0184	0	1	;
/*	175	*/	7	30	30	0	1	-5	2	1	0	0	1	0	0	5.47384	0	1	29	686.352	7.45778	0	1	;
/*	176	*/	7	25	25	0	1	0	3	1	0	0	1	0	0	17.0181	0	1	28	669.598	38.8017	0	1	;
/*	177	*/	7	26	26	0	1	-2	3	1	0	0	1	0	0	7.55534	0	1	24	686.42	31.7654	0	1	;
/*	178	*/	7	28	28	0	1	-4	2	1	0	0	1	0	0	11.0815	0	1	36	723.556	10.4991	0	1	;
/*	179	*/	7	26	26	0	1	-2	2	1	0	0	1	0	0	12.9719	0	1	40	735.972	12.3624	0	1	;
/*	180	*/	7	26	26	0	1	-2	2	1	0	0	1	0	0	11.3852	0	1	44	769.45	19.4397	0	1	;
/*	181	*/	7	29	29	0	1	-5	2	1	0	0	1	0	0	10.1862	0	1	48	770.404	9.00891	0	1	;
/*	182	*/	7	28	28	0	1	-4	2	1	0	0	1	0	0	5.74256	0	1	48	780.555	4.81575	0	1	;
/*	183	*/	7	25	25	0	1	2	3	1	0	0	0	0	0	5.74256	1	0	44	785.585	4.06801	0	1	;
/*	184	*/	7	22	22	0	1	-2	2	1	0	0	1	0	0	8.9831	0	1	42	783.553	15.3461	0	1	;
/*	185	*/	7	28	28	0	1	-3	3	1	0	0	0	0	0	7.77642	1	0	30	779.725	9.56408	0	1	;
/*	186	*/	7	25	25	0	1	0	2	1	0	0	0	0	0	6.7285	1	0	29	759.533	7.97045	0	1	;
/*	187	*/	14	33	33	0	1	-3	3	1	0	0	0	0	0	6.7285	1	0	29	756.253	9.33244	0	1	;
/*	188	*/	7	14	18	1	1	-5	3	1	0	0	1	0	0	34.7191	0	1	21	709.535	7.89173	0	1	;
/*	189	*/	7	28	28	0	1	-3	2	1	0	0	1	0	0	31.533	0	1	22	661.242	27.1797	0	1	;
/*	190	*/	7	29	29	0	1	-4	3	1	0	0	1	0	0	39.9537	0	1	24	623.674	26.241	0	1	;
/*	191	*/	7	29	29	0	1	-4	2	1	0	0	1	0	0	9.79502	0	1	22	575.259	26.0305	0	1	;
/*	192	*/	10	33	33	0	1	-8	2	1	0	0	1	0	0	12.9719	0	1	39	748.908	4.61326	0	1	;
/*	193	*/	10	29	29	0	1	-3	2	1	0	0	1	0	0	13.3002	0	1	34	779.683	20.1397	0	1	;
/*	194	*/	10	33	33	0	1	-6	2	1	0	0	0	0	0	8.698	1	0	30	783.34	9.1677	0	1	;
/*	195	*/	14	30	30	0	1	-6	2	1	0	0	1	0	0	16.1338	0	1	31	707.848	12.6433	0	1	;
/*	196	*/	14	35	35	0	1	-12	2	1	0	0	1	0	0	12.5036	0	1	28	694.342	11.6297	0	1	;
/*	197	*/	14	26	26	0	1	-2	2	1	0	0	1	0	0	32.2508	0	1	25	610.819	50.1877	0	1	;
/*	198	*/	14	34	34	0	1	-8	3	1	0	0	1	0	0	8.47148	0	1	23	574.507	17.4139	0	1	;
/*	199	*/	14	37	37	0	1	-12	2	1	0	0	1	0	0	3.40938	0	1	20	578.939	36.4591	0	1	;
/*	200	*/	14	40	40	0	1	-14	2	1	0	0	1	0	0	3.40938	0	1	20	577.525	38.3009	0	1	;
/*	201	*/	14	33	33	0	1	-7	2	1	0	0	1	0	0	28.6794	0	1	29	625.061	27.7053	0	1	;
/*	202	*/	14	37	37	0	1	-13	2	1	0	0	1	0	0	15.632	0	1	13	487.833	23.3509	0	1	;
/*	203	*/	14	38	38	0	1	-12	2	1	0	0	1	0	0	30.5595	0	1	11	461.053	50.322	0	1	;
/*	204	*/	18	37	37	0	1	-10	3	1	0	0	0	0	0	6.45162	1	0	30	785.861	2.35898	0	1	;
/*	205	*/	18	35	35	0	1	-12	2	1	0	0	1	0	0	8.09978	0	1	25	682.456	21.4864	0	1	;
/*	206	*/	18	28	28	0	1	-6	2	1	0	0	1	0	0	9.87824	0	1	31	744.226	23.6338	0	1	;
/*	207	*/	18	38	38	0	1	-16	2	1	0	0	1	0	0	9.24181	0	1	29	754.562	18.8663	0	1	;
/*	208	*/	18	33	33	0	1	-11	2	1	0	0	1	0	0	9.87824	0	1	30	743.322	29.3829	0	1	;
/*	209	*/	7	28	28	0	1	-3	2	1	0	0	0	0	0	2.89868	1	0	35	798.08	4.94869	0	1	;
/*	210	*/	7	30	30	0	1	-5	2	1	0	0	1	0	0	4.65912	0	1	34	793.49	8.51508	0	1	;
/*	211	*/	7	29	29	0	1	-4	2	1	0	0	0	0	0	3.43862	1	0	33	795.594	8.13716	0	1	;
/*	212	*/	7	27	27	0	1	0	3	1	0	0	0	0	0	3.43862	1	0	32	793.406	7.24458	0	1	;
/*	213	*/	7	29	29	0	1	-4	2	1	0	0	0	0	0	3.50348	1	0	30	792.323	5.88446	0	1	;
/*	214	*/	10	32	32	0	1	-7	2	1	0	0	0	0	0	2.89868	1	0	36	799.867	2.45733	0	1	;
/*	215	*/	4	14	18	1	1	-2	2	1	0	0	1	0	0	12.8387	0	1	47	760.454	7.65651	0	1	;
/*	216	*/	7	14	18	1	1	-3	2	1	0	0	0	0	0	7.77642	1	0	30	774.809	13.4135	0	1	;
/*	217	*/	7	14	18	1	1	-3	2	1	0	0	1	0	0	31.533	0	1	36	692.57	39.7523	0	1	;
/*	218	*/	7	14	18	1	1	0	3	1	0	0	1	0	0	8.47148	0	1	24	573.192	9.70345	0	1	;
/*	219	*/	10	33	33	0	1	-8	2	1	0	0	1	0	0	5.47384	0	1	32	690.94	2.4183	0	1	;
/*	220	*/	10	14	18	1	1	-6	2	1	0	0	1	0	0	6.45162	0	1	30	788.152	1.48681	0	1	;
/*	221	*/	14	15	18	1	1	-8	2	1	0	0	1	0	0	8.50142	0	1	39	787.09	10.6108	0	1	;
/*	222	*/	14	30	33	1	1	-12	1	1	0	0	1	0	0	6.2157	0	1	19	559.269	20.8544	0	1	;
/*	223	*/	14	48	48	0	1	-10	2	1	0	0	1	0	0	14.5144	0	1	16	544.803	25.1874	0	1	;
/*	224	*/	14	35	35	0	1	-7	2	1	0	0	1	0	0	8.08116	0	1	12	499.708	25.2958	0	1	;
/*	225	*/	18	37	41	1	1	-15	2	1	0	0	1	0	0	11.0815	0	1	32	729.652	1.09977	0	1	;
/*	226	*/	18	44	44	0	1	-14	2	1	0	0	1	0	0	7.55534	0	1	24	686.074	25.4744	0	1	;
/*	227	*/	18	22	34	1	1	-14	2	1	0	0	1	0	0	23.9198	0	1	3	350.769	13.2958	0	1	;
/*	228	*/	18	42	44	1	1	-10	4	1	0	0	1	0	0	11.6907	0	1	25	564.505	24.0585	0	1	;
/*	229	*/	28	29	31	1	1	-25	1	1	0	0	1	0	0	33.0642	0	1	11	459.423	18.6605	0	1	;
/*	230	*/	10	26	26	0	1	-5	3	1	0	0	0	0	0	11.7942	1	0	28	767.497	9.47924	0	1	;
/*	231	*/	26	41	44	1	1	-23	1	1	0	0	1	0	0	13.955	0	1	27	602.816	23.2992	0	1	;
/*	232	*/	7	30	30	0	1	-2	3	1	0	0	1	0	0	23.9198	0	1	5	370.646	34.6823	0	1	;
/*	233	*/	7	26	26	0	1	2	3	1	0	0	0	0	0	7.70705	1	0	38	795.221	2.45131	0	1	;
/*	234	*/	7	30	30	0	1	-5	2	0	0	0	0	0	0	8.15619	1	0	24	692.715	13.599	0	1	;
/*	235	*/	7	28	28	0	1	-3	3	0	0	1	0	0	0	5.91674	1	0	27	695.696	6.5942	0	1	;
/*	236	*/	7	22	22	0	1	2	2	0	0	1	0	0	0	5.91674	1	0	27	690.89	9.0372	0	1	;
/*	237	*/	7	25	25	0	1	-3	3	0	0	0	0	0	0	11.6624	1	0	29	679.356	6.08237	0	1	;
/*	238	*/	7	28	28	0	1	-3	3	0	0	1	0	0	0	4.02578	1	0	31	682.992	11.8995	0	1	;
/*	239	*/	7	28	28	0	1	-3	3	0	0	1	0	0	0	4.02578	1	0	32	686.325	7.87499	0	1	;
/*	240	*/	7	36	38	1	1	-5	1	0	0	1	0	0	0	9.1454	1	0	40	678.055	10.8753	0	1	;
/*	241	*/	7	28	28	0	1	-3	3	0	0	1	0	0	0	12.3819	1	0	44	666.499	12.6957	0	1	;
/*	242	*/	10	29	29	0	1	-7	2	1	0	0	0	0	0	17.1024	1	0	32	708.872	4.17775	0	1	;
/*	243	*/	10	14	18	1	1	-5	2	1	0	0	0	0	0	8.15619	1	0	26	688.266	7.54463	0	1	;
/*	244	*/	26	49	49	0	1	-23	2	1	0	0	0	0	0	12.3819	1	0	45	672.281	2.86748	0	1	;
/*	245	*/	7	14	18	1	1	-4	2	0	1	0	1	0	0	23.7239	0	1	3	303.796	45.2078	0	1	;
/*	246	*/	7	14	18	1	1	-4	2	1	0	0	1	0	0	23.7239	0	1	3	327.43	56.1974	0	1	;
/*	247	*/	7	14	18	1	1	-4	2	1	0	0	1	0	0	51.5785	0	1	9	371.41	57.1816	0	1	;
/*	248	*/	7	14	18	1	1	-2	3	1	0	0	1	0	0	11.3626	0	1	24	458.863	23.7511	0	1	;
/*	249	*/	7	14	18	1	1	-2	3	1	0	0	1	0	0	14.6797	0	1	21	451.605	8.76877	0	1	;
/*	250	*/	7	28	28	0	1	-4	3	1	0	0	1	0	0	11.3626	0	1	24	461.14	13.1202	0	1	;
/*	251	*/	7	14	18	1	1	-4	2	1	0	0	1	0	0	1.95688	0	1	25	485.945	3.6276	0	1	;
/*	252	*/	7	14	18	1	1	-4	2	1	0	0	1	0	0	1.95688	0	1	26	486.634	4.81192	0	1	;
/*	253	*/	7	28	28	0	1	-4	2	1	0	0	1	0	0	5.20699	0	1	27	479.453	14.4755	0	1	;
/*	254	*/	7	14	18	1	1	-3	3	1	0	0	1	0	0	5.20699	0	1	28	484.66	11.6785	0	1	;
/*	255	*/	7	30	30	0	1	-3	3	1	0	0	1	0	0	6.6204	0	1	30	491.24	8.79957	0	1	;
/*	256	*/	7	14	18	1	1	-2	3	1	0	0	1	0	0	7.86553	0	1	30	498.092	1.8477	0	1	;
/*	257	*/	7	14	18	1	1	-2	3	1	0	0	1	0	0	14.7204	0	1	29	473.12	29.0969	0	1	;
/*	258	*/	7	14	18	1	1	-5	1	1	0	0	1	0	0	6.11433	0	1	36	500.109	22.2421	0	1	;
/*	259	*/	7	14	18	1	1	-4	2	1	0	0	1	0	0	6.11433	0	1	33	499.895	17.4247	0	1	;
/*	260	*/	7	14	18	1	1	-3	3	1	0	0	1	0	0	6.63174	0	1	30	501.296	11.3572	0	1	;
/*	261	*/	7	34	34	0	1	-5	3	1	0	0	1	0	0	22.0396	0	1	35	514.817	42.0094	0	1	;
/*	262	*/	7	11	14	1	1	-5	1	1	0	0	1	0	0	14.2052	0	1	38	546.742	45.6919	0	1	;
/*	263	*/	7	35	35	0	1	-5	2	1	0	0	1	0	0	23.7268	0	1	42	481.558	49.8637	0	1	;
/*	264	*/	7	30	30	0	1	-5	3	1	0	0	1	0	0	24.0872	0	1	44	526.034	32.3698	0	1	;
/*	265	*/	7	14	18	1	1	-5	2	1	0	0	1	0	0	10.8088	0	1	38	549.177	58.5919	0	1	;
/*	266	*/	7	14	18	1	1	-4	2	1	0	0	1	0	0	10.8088	0	1	41	548.343	58.5187	0	1	;
/*	267	*/	7	14	18	1	1	-2	3	1	0	0	1	0	0	11.6128	0	1	39	553.994	52.5338	0	1	;
/*	268	*/	7	14	18	1	1	-4	2	1	0	0	1	0	0	6.09213	0	1	38	555.998	39.9628	0	1	;
/*	269	*/	7	14	18	1	1	-5	2	1	0	0	1	0	0	6.09213	0	1	39	550.613	39.0012	0	1	;
/*	270	*/	7	14	18	1	1	-4	2	1	0	0	1	0	0	8.03454	0	1	41	543.047	32.379	0	1	;
/*	271	*/	7	14	18	1	1	-5	2	1	0	0	1	0	0	8.87503	0	1	41	537.706	34.9917	0	1	;
/*	272	*/	7	14	18	1	1	-5	3	1	0	0	1	0	0	13.1639	0	1	47	540.588	20.4291	0	1	;
/*	273	*/	7	14	18	1	1	-4	2	1	0	0	1	0	0	16.9897	0	1	38	573.852	53.8546	0	1	;
/*	274	*/	7	14	18	1	1	-5	2	1	0	0	1	0	0	10.304	0	1	36	590.608	46.9963	0	1	;
/*	275	*/	7	14	18	1	1	-5	3	1	0	0	1	0	0	10.304	0	1	37	598.903	37.1378	0	1	;
/*	276	*/	7	14	18	1	1	-3	3	1	0	0	1	0	0	22.8433	0	1	31	579.244	27.2867	0	1	;
/*	277	*/	7	14	18	1	1	-5	2	1	0	0	1	0	0	20.3098	0	1	57	575.493	17.733	0	1	;
/*	278	*/	7	14	18	1	1	-5	3	1	0	0	1	0	0	2.55136	0	1	70	584.373	4.93907	0	1	;
/*	279	*/	10	14	18	1	1	-5	2	1	0	0	1	0	0	9.27665	0	1	41	542.527	44.3059	0	1	;
/*	280	*/	10	14	18	1	1	-8	1	1	0	0	1	0	0	9.27665	0	1	42	535.935	46.396	0	1	;
/*	281	*/	10	33	33	0	1	-8	2	1	0	0	1	0	0	20.8053	0	1	34	468.745	14.7197	0	1	;
/*	282	*/	10	14	18	1	1	-4	3	1	0	0	1	0	0	16.1742	0	1	29	451.141	14.6309	0	1	;
/*	283	*/	10	14	18	1	1	-6	2	1	0	0	1	0	0	16.1742	0	1	35	452.789	29.0925	0	1	;
/*	284	*/	14	35	35	0	1	-8	3	1	0	0	1	0	0	22.8433	0	1	28	598.322	6.30834	0	1	;
/*	285	*/	14	33	33	0	1	-6	2	1	0	0	1	0	0	15.8714	0	1	34	484.983	43.9799	0	1	;
/*	286	*/	14	15	18	1	1	1	2	1	0	0	1	0	0	14.8889	0	1	33	469.768	56.5794	0	1	;
/*	287	*/	14	35	35	0	1	-10	2	1	0	0	1	0	0	14.1338	0	1	31	469.096	44.575	0	1	;
/*	288	*/	14	30	30	0	1	-3	3	1	0	0	1	0	0	14.1338	0	1	30	455.01	51.0902	0	1	;
/*	289	*/	18	28	30	1	1	-16	1	1	0	0	1	0	0	21.73	0	1	19	430.742	10.004	0	1	;
/*	290	*/	18	26	28	1	1	-16	1	1	0	0	1	0	0	16.9871	0	1	18	403.044	25.3921	0	1	;
/*	291	*/	7	14	18	1	1	-5	2	1	0	0	1	0	0	13.0512	0	1	41	533.789	48.0021	0	1	;
/*	292	*/	14	33	36	1	1	-12	1	1	0	0	1	0	0	21.7439	0	1	42	501.949	45.4054	0	1	;
/*	293	*/	7	24	24	0	1	2	3	1	0	0	0	0	0	2.55136	1	0	69	585.619	4.11502	0	1	;
/*	294	*/	7	26	26	0	1	0	3	1	0	0	0	0	0	3.26959	1	0	71	587.595	3.72389	0	1	;
/*	295	*/	7	26	26	0	1	0	3	1	0	0	0	0	0	6.12802	1	0	72	590.993	9.99942	0	1	;
/*	296	*/	7	26	26	0	1	-2	2	1	0	0	0	0	0	4.50188	1	0	68	591.432	15.7166	0	1	;
/*	297	*/	7	28	28	0	1	-4	2	1	0	0	0	0	0	4.50188	1	0	69	595.889	12.7181	0	1	;
/*	298	*/	7	26	26	0	1	-3	3	0	0	1	0	0	0	6.5206	1	0	64	594.267	17.0932	0	1	;
/*	299	*/	7	25	25	0	1	2	3	0	0	1	0	0	0	6.75279	1	0	41	619.433	11.0216	0	1	;
/*	300	*/	7	28	28	0	1	-3	3	1	0	0	0	0	0	8.7779	1	0	42	615.571	18.945	0	1	;
/*	301	*/	14	34	34	0	1	-8	3	1	0	0	0	0	0	11.9586	1	0	43	605.563	17.1488	0	1	;
/*	302	*/	18	30	30	0	1	-6	3	1	0	0	0	0	0	8.64421	1	0	43	614.76	11.4123	0	1	;
/*	303	*/	18	30	30	0	1	-6	2	1	0	0	0	0	0	9.35516	1	0	66	603.617	9.64544	0	1	;
/*	304	*/	22	29	29	0	1	-4	2	1	0	0	0	0	0	2.4005	1	0	25	872.193	9.81336	0	1	;
/*	305	*/	13	38	38	0	1	-12	2	1	0	0	0	1	0	22.0396	0	1	38	495.967	41.7035	0	1	;
/*	306	*/	7	30	30	0	1	-5	3	1	0	0	0	1	0	9.54142	1	0	56	670.493	10.5122	0	1	;
/*	307	*/	7	25	25	0	1	-3	3	1	0	0	0	1	0	0.726508	1	0	61	661.491	7.08352	0	1	;
/*	308	*/	7	29	29	0	1	-4	2	1	0	0	0	1	0	2.22656	1	0	62	660.406	6.52932	0	1	;
/*	309	*/	7	36	38	1	1	-5	1	1	0	0	0	1	0	0.726508	1	0	61	660.781	7.99832	0	1	;
/*	310	*/	7	28	28	0	1	-4	2	1	0	0	0	1	0	4.85033	1	0	60	661.066	11.7677	0	1	;
/*	311	*/	7	28	28	0	1	-4	2	1	0	0	0	1	0	13.0215	1	0	70	646.212	8.21923	0	1	;
/*	312	*/	10	30	30	0	1	-5	3	1	0	0	0	1	0	9.22207	1	0	72	625.395	8.93323	0	1	;
/*	313	*/	10	39	41	1	1	-9	1	1	0	0	0	1	0	9.22207	1	0	71	618.651	7.29112	0	1	;
/*	314	*/	10	14	18	1	1	-4	2	1	0	0	0	1	0	15.8372	1	0	60	756.602	5.4912	0	1	;
/*	315	*/	10	27	27	0	1	-2	2	1	0	0	0	1	0	18.8724	1	0	54	728.349	7.29239	0	1	;
/*	316	*/	7	30	30	0	1	-5	3	1	0	0	0	1	0	4.59042	1	0	56	718.451	7.68123	0	1	;
/*	317	*/	7	30	30	0	1	-5	2	1	0	0	0	1	0	4.59042	1	0	57	716.03	7.99821	0	1	;
/*	318	*/	7	30	30	0	1	-5	2	1	0	0	0	1	0	9.9023	1	0	51	708.805	10.2233	0	1	;
/*	319	*/	7	30	30	0	1	-5	3	1	0	0	0	1	0	9.9023	0	0	55	703.403	10.5233	0	1	;
/*	320	*/	7	29	29	0	1	-5	3	1	0	0	0	1	0	9.11702	1	0	56	693.326	8.51933	0	1	;
/*	321	*/	7	29	29	0	1	-5	2	1	0	0	0	1	0	9.11702	1	0	57	690.385	11.3683	0	1	;
/*	322	*/	7	14	18	1	1	-3	2	1	0	0	0	1	0	10.5696	1	0	52	684.228	10.3683	0	1	;
/*	323	*/	14	25	25	0	1	1	2	1	0	0	0	1	0	15.8372	0	0	60	767.722	9.97124	0	1	;
/*	324	*/	10	29	29	0	1	-4	3	0	0	1	0	1	0	16.1175	1	0	47	695.115	12.4638	0	1	;
/*	325	*/	10	28	28	0	1	-4	2	0	0	1	0	1	0	12.5903	1	0	36	688.993	12.3557	0	1	;
/*	326	*/	10	28	28	0	1	-4	2	0	0	1	0	1	0	8.82011	1	0	31	678.37	15.7151	0	1	;
/*	327	*/	10	32	32	0	1	-8	2	0	0	1	0	1	0	8.53003	0	0	29	671.209	19.0785	0	1	;
/*	328	*/	10	28	28	0	1	-4	3	0	0	1	0	1	0	7.14259	1	0	28	664.286	14.8039	0	1	;
/*	329	*/	10	28	28	0	1	-4	3	0	0	1	0	1	0	5.08438	1	0	25	660.316	14.5172	0	1	;
/*	330	*/	10	27	27	0	1	-3	3	0	0	1	0	1	0	4.46331	0	0	24	659.826	16.7408	0	1	;
/*	331	*/	10	32	32	0	1	-6	3	0	0	1	0	1	0	5.27034	0	0	24	658.044	18.914	0	1	;
/*	332	*/	10	30	30	0	1	-6	2	0	0	1	0	1	0	8.44549	1	0	24	649.92	13.1886	0	1	;
/*	333	*/	10	38	38	0	1	-12	2	1	0	0	0	1	0	4.46331	0	0	24	662.172	20.7239	0	1	;
/*	334	*/	10	32	32	0	1	-8	2	0	0	1	0	1	0	9.68803	1	0	26	680.104	21.35	0	1	;
/*	335	*/	10	34	34	0	1	-7	2	0	0	1	0	1	0	16.8946	0	0	35	725.74	11.1481	0	1	;
/*	336	*/	22	28	28	0	1	0	3	0	0	1	0	1	0	9.95178	1	0	44	703.102	7.40754	0	1	;
/*	337	*/	22	29	29	0	1	-3	2	1	0	0	0	1	0	9.95178	0	0	43	693.199	15.9573	0	1	;
/*	338	*/	22	41	41	0	1	-15	2	1	0	0	0	1	0	8.82011	1	0	32	687.153	7.96588	0	1	;
/*	339	*/	22	45	45	0	1	-21	1	0	0	1	0	1	0	10.545	1	0	26	676.768	5.95709	0	1	;
/*	340	*/	22	32	32	0	1	-6	2	0	0	1	0	1	0	7.29669	0	0	27	669.844	15.2163	0	1	;
/*	341	*/	7	28	28	0	1	-2	2	0	0	1	0	1	0	12.2273	0	1	46	702.193	2.9217	0	1	;
/*	342	*/	7	28	28	0	1	-2	2	0	0	1	0	1	0	12.2273	1	0	38	713.55	14.1669	0	1	;
/*	343	*/	7	29	29	0	1	-5	3	1	0	0	0	1	0	20.8604	1	0	40	727.684	14.9511	0	1	;
/*	344	*/	7	30	30	0	1	-6	1	1	0	0	0	1	0	1.23941	0	0	41	741.597	15.6255	0	1	;
/*	345	*/	14	34	34	0	1	-9	2	0	0	1	0	1	0	6.49209	1	0	41	737.569	9.5126	0	1	;
/*	346	*/	18	30	32	1	1	-6	2	1	0	0	0	1	0	1.23941	0	0	41	740.817	15.474	0	1	;
/*	347	*/	18	42	44	1	1	-18	2	0	0	1	0	1	0	6.1792	1	0	52	772.71	13.6532	0	1	;
/*	348	*/	22	45	45	0	1	-19	2	1	0	0	0	1	0	9.78699	1	0	55	778.537	13.6513	0	1	;
/*	349	*/	22	41	41	0	1	-15	2	1	0	0	0	1	0	5.34177	0	0	47	771.64	11.2673	0	1	;
/*	350	*/	18	30	30	0	1	-4	2	0	0	1	0	1	0	2.75563	1	0	49	783.387	8.09	0	1	;
/*	351	*/	18	34	34	0	1	-8	2	0	0	1	0	1	0	3.16616	1	0	56	787.128	10.4168	0	1	;
/*	352	*/	18	34	34	0	1	-7	2	0	0	1	0	1	0	2.75563	1	0	51	784.186	9.12	0	1	;
/*	353	*/	7	29	29	0	1	-5	3	0	0	1	0	1	0	7.00865	1	0	57	780.034	9.53679	0	1	;
/*	354	*/	7	32	32	0	1	-3	3	0	0	1	0	1	0	3.62639	0	0	54	789.725	20.0227	0	1	;
/*	355	*/	7	30	30	0	1	-5	3	0	0	1	0	1	0	3.16616	1	0	54	786.81	11.9462	0	1	;
/*	356	*/	7	30	30	0	1	-5	2	0	0	1	0	1	0	2.56595	0	0	50	798.543	15.2171	0	1	;
/*	357	*/	7	29	29	0	1	-3	3	0	0	1	0	1	0	1.91785	0	0	50	805.111	16.6638	0	1	;
/*	358	*/	7	28	28	0	1	-5	2	0	0	1	0	1	0	3.17132	1	0	48	816.279	13.288	0	1	;
/*	359	*/	7	28	28	0	1	-3	3	0	0	1	0	1	0	3.17132	1	0	47	817.038	12.1614	0	1	;
/*	360	*/	7	29	29	0	1	-3	2	0	0	1	0	1	0	1.36569	1	0	46	820.212	11.3109	0	1	;
/*	361	*/	7	30	30	0	1	-5	3	0	0	1	0	1	0	3.36075	0	0	47	824.443	16.788	0	1	;
/*	362	*/	7	31	31	0	1	-5	2	0	0	1	0	1	0	2.24181	0	0	46	826.64	17.1499	0	1	;
/*	363	*/	7	30	30	0	1	-5	2	0	0	1	0	1	0	2.24181	1	0	46	825.262	15.0108	0	1	;
/*	364	*/	7	31	31	0	1	-5	3	0	0	1	0	1	0	4.43194	1	0	43	823.919	11.5041	0	1	;
/*	365	*/	7	28	28	0	1	-5	2	0	0	1	0	1	0	4.2312	1	0	41	830.117	13.0463	0	1	;
/*	366	*/	7	28	28	0	1	-3	3	0	0	1	0	1	0	2.62052	1	0	41	830.809	10.995	0	1	;
/*	367	*/	7	30	30	0	1	-5	3	0	0	1	0	1	0	2.62052	1	0	41	831.533	10.2647	0	1	;
/*	368	*/	14	33	33	0	1	-9	2	0	0	1	0	1	0	5.34177	0	0	50	774.804	20.9937	0	1	;
/*	369	*/	14	38	38	0	1	-11	2	0	0	1	0	1	0	4.30481	0	0	52	778.257	19.8005	0	1	;
/*	370	*/	14	32	32	0	1	-6	2	0	0	1	0	1	0	4.30481	0	0	53	781.564	21.1466	0	1	;
/*	371	*/	14	38	38	0	1	-12	2	0	0	1	0	1	0	2.56595	0	0	50	798.518	16.6558	0	1	;
/*	372	*/	14	36	36	0	1	-10	2	0	0	1	0	1	0	1.91785	0	0	49	803.849	14.8046	0	1	;
/*	373	*/	14	33	33	0	1	-7	2	0	0	1	0	1	0	4.08208	0	0	49	807.961	15.6903	0	1	;
/*	374	*/	14	33	33	0	1	-11	2	0	0	1	0	1	0	4.08208	0	0	49	809.856	19.3053	0	1	;
/*	375	*/	14	38	38	0	1	-12	2	0	0	1	0	1	0	7.31492	0	0	49	813.875	15.2388	0	1	;
/*	376	*/	14	27	27	0	1	-2	2	0	0	1	0	1	0	8.6446	0	1	46	812.477	2.7535	0	1	;
/*	377	*/	14	32	32	0	1	-7	2	0	0	1	0	1	0	21.1025	0	0	37	846.203	14.5903	0	1	;
/*	378	*/	18	32	32	0	1	-6	2	0	0	1	0	1	0	3.83133	1	0	50	831.052	11.9752	0	1	;
/*	379	*/	18	28	28	0	1	-2	2	0	0	1	0	1	0	3.83133	1	0	51	832.507	9.03298	0	1	;
/*	380	*/	18	39	39	0	1	-14	3	0	0	1	0	1	0	12.3818	1	0	51	822.187	13.8552	0	1	;
/*	381	*/	20	35	35	0	1	-6	3	0	1	0	0	1	0	35.7932	1	0	49	1206.07	23.6848	0	1	;
/*	382	*/	7	30	30	0	1	-5	2	0	0	1	0	1	0	3.62639	0	0	53	786.528	16.4194	0	1	;
/*	383	*/	7	30	30	0	1	-5	3	0	0	1	0	1	0	3.5421	1	0	51	801.281	11.3048	0	1	;
/*	384	*/	7	26	26	0	1	1	2	0	0	1	0	1	0	1.36569	1	0	46	821.327	12.6765	0	1	;
/*	385	*/	7	14	18	1	1	-6	1	0	0	1	0	1	0	2.33365	1	0	51	797.832	11.3105	0	1	;
/*	386	*/	7	29	29	0	1	-3	3	1	0	0	0	1	0	2.33365	0	0	50	799.925	13.6194	0	1	;
/*	387	*/	22	44	44	0	1	-8	2	0	0	1	0	1	0	4.2312	1	0	41	826.024	9.06949	0	1	;
/*	388	*/	26	46	46	0	1	-20	2	0	0	0	0	1	0	4.93712	1	0	50	826.864	14.3332	0	1	;
/*	389	*/	26	49	49	0	1	-24	2	0	0	1	0	1	0	8.34288	0	0	13	924.949	18.3768	0	1	;
/*	390	*/	10	36	36	0	1	-8	3	1	0	0	0	1	0	11.2004	1	0	13	927.775	14.7059	0	1	;
/*	391	*/	10	32	32	0	1	-8	2	1	0	0	0	1	0	8.79983	0	0	13	918.059	25.7597	0	1	;
/*	392	*/	10	32	32	0	1	-6	2	0	0	0	0	1	0	0.619695	0	0	13	916.095	23.4274	0	1	;
/*	393	*/	7	27	27	0	1	-1	2	1	0	0	0	1	0	15.6602	1	0	13	894.533	15.3476	0	1	;
/*	394	*/	14	31	31	0	1	-8	3	0	0	1	0	1	0	15.6602	1	0	19	885.739	14.0284	0	1	;
/*	395	*/	10	40	42	1	1	-8	2	0	0	1	0	1	0	3.36424	0	0	13	914.455	23.6694	0	1	;
/*	396	*/	14	42	45	1	1	-13	1	1	0	0	0	1	0	0.619695	1	0	13	915.624	22.8097	0	1	;
/*	397	*/	26	28	30	1	1	-24	1	1	0	0	0	1	0	7.14574	0	0	13	907.476	18.6217	0	1	;
/*	398	*/	10	33	33	0	1	-8	2	0	0	0	0	1	0	22.6863	0	0	9	991.626	18.559	0	1	;
/*	399	*/	10	32	32	0	1	-8	2	0	0	0	0	1	0	5.59251	0	0	9	1004.5	7.15	0	1	;
/*	400	*/	10	32	32	0	1	-6	3	0	0	0	0	1	0	3.82167	0	0	9	1009.4	10.4661	0	1	;
/*	401	*/	10	32	32	0	1	-8	3	0	0	0	0	1	0	3.13271	0	0	9	1006.25	10.0709	0	1	;
/*	402	*/	7	31	31	0	1	-5	2	1	0	0	0	1	0	27.9044	0	0	9	977.79	18.6606	0	1	;
/*	403	*/	7	14	18	1	1	-5	2	1	0	0	0	1	0	31.5173	1	0	27	954.472	9.48857	0	1	;
/*	404	*/	35	39	41	1	1	-15	2	1	0	0	0	1	0	4.46648	0	0	9	1004.4	7.49039	0	1	;
/*	405	*/	14	39	39	0	1	-13	2	0	0	0	0	1	0	5.39749	0	0	9	999.432	8.46382	0	1	;
/*	406	*/	7	31	31	0	1	-5	3	0	0	1	0	1	0	8.34288	0	0	13	922.227	9.33707	0	1	;
/*	407	*/	26	47	47	0	1	-22	2	1	0	0	0	1	0	17.8922	0	0	13	945.615	9.63	0	1	;
/*	408	*/	1	24	24	0	1	2	2	0	0	1	0	1	0	9.6441	1	0	16	1321.8	11.9645	0	1	;
/*	409	*/	1	24	24	0	1	1	3	0	0	1	0	1	0	7.52343	0	0	9	1076.55	13.9737	0	1	;
/*	410	*/	1	22	22	0	1	1	2	1	0	0	0	1	0	5.18613	1	0	23	1215.51	11.3529	0	1	;
/*	411	*/	4	30	30	0	1	-2	2	1	0	0	0	1	0	4.07393	1	0	22	1201.06	12.4718	0	1	;
/*	412	*/	4	26	26	0	1	0	3	0	0	1	0	1	0	5.8205	0	0	22	1174.24	14.3754	0	1	;
/*	413	*/	10	33	33	0	1	-7	2	0	0	1	0	1	0	6.90836	0	0	18	1303.29	14.251	0	1	;
/*	414	*/	10	33	33	0	1	-8	2	1	0	0	0	1	0	6.9868	0	0	19	1297.67	12.5019	0	1	;
/*	415	*/	10	35	35	0	1	-8	3	1	0	0	0	1	0	4.79952	0	0	21	1291.47	13.1344	0	1	;
/*	416	*/	10	32	32	0	1	-8	3	1	0	0	0	1	0	8.87169	0	0	24	1279.4	14.2556	0	1	;
/*	417	*/	10	31	31	0	1	-6	2	1	0	0	0	1	0	17.0865	1	0	23	1265.61	13.7769	0	1	;
/*	418	*/	10	35	35	0	1	-9	2	0	0	1	0	1	0	9.60452	1	0	24	1229.15	10.449	0	1	;
/*	419	*/	10	29	29	0	1	-5	3	0	0	1	0	1	0	5.18613	1	0	23	1212.43	9.49498	0	1	;
/*	420	*/	10	31	31	0	1	-5	2	0	0	1	0	1	0	5.50274	1	0	22	1206.94	12.227	0	1	;
/*	421	*/	10	29	29	0	1	-4	3	1	0	0	0	1	0	4.07393	0	0	22	1197.2	13.4411	0	1	;
/*	422	*/	10	30	30	0	1	-6	3	1	0	0	0	1	0	5.8205	1	0	22	1169.97	14.1116	0	1	;
/*	423	*/	10	34	34	0	1	-8	3	1	0	0	0	1	0	7.77542	1	0	23	1162.46	13.5933	0	1	;
/*	424	*/	10	34	34	0	1	-8	3	1	0	0	0	1	0	7.77542	0	0	23	1154.97	13.8667	0	1	;
/*	425	*/	10	27	27	0	1	-3	3	0	0	1	0	1	0	9.82451	0	0	21	1136.99	14.945	0	1	;
/*	426	*/	10	38	38	0	1	-8	2	1	0	0	0	1	0	9.82451	0	0	19	1128.61	14.4192	0	1	;
/*	427	*/	10	32	32	0	1	-8	3	1	0	0	0	1	0	8.78121	0	0	14	1103.61	13.6469	0	1	;
/*	428	*/	10	30	30	0	1	-6	2	0	0	1	0	1	0	8.78121	0	0	13	1096.76	14.5212	0	1	;
/*	429	*/	18	42	42	0	1	-16	2	0	0	1	0	1	0	10.0343	0	0	15	1342.78	13.662	0	1	;
/*	430	*/	18	39	39	0	1	-14	2	0	0	1	0	1	0	6.76928	0	0	15	1332.23	14.2536	0	1	;
/*	431	*/	18	33	33	0	1	-8	2	1	0	0	0	1	0	6.90836	0	0	18	1309.63	13.6951	0	1	;
/*	432	*/	18	43	43	0	1	-16	2	1	0	0	0	1	0	8.95018	1	0	22	1184.14	13.7979	0	1	;
/*	433	*/	25	42	45	1	1	-23	2	1	0	0	0	1	0	10.0343	1	0	15	1339.67	5.32276	0	1	;
/*	434	*/	28	42	42	0	1	-16	2	1	0	0	0	1	0	8.87402	1	0	23	1149.47	12.8103	0	1	;
/*	435	*/	28	36	36	0	1	-10	2	1	0	0	0	1	0	13.4166	1	0	16	1117.96	13.9619	0	1	;
/*	436	*/	28	38	38	0	1	-13	2	1	0	0	0	1	0	9.73297	1	0	23	1205.92	8.19337	0	1	;
/*	437	*/	10	25	25	0	1	2	3	0	0	1	0	1	0	6.76928	0	0	15	1325.49	11.4139	0	1	;
/*	438	*/	18	35	35	0	1	-9	2	0	0	1	0	1	0	5.8911	0	0	14	1358.85	13.5649	0	1	;
/*	439	*/	28	35	35	0	1	-13	2	1	0	0	0	1	0	17.825	1	0	23	1242.17	13.6863	0	1	;
/*	440	*/	18	39	41	1	1	-16	2	1	0	0	0	1	0	4.79952	0	0	22	1286.72	13.9815	0	1	;
/*	441	*/	18	45	47	1	1	-15	2	1	0	0	0	1	0	8.90329	1	0	22	1182.21	7.48022	0	1	;
/*	442	*/	26	38	41	1	1	-23	1	1	0	0	0	1	0	7.52343	1	0	10	1083.43	12.8426	0	1	;
/*	443	*/	22	39	39	0	1	-13	2	0	0	1	0	1	0	5.8911	1	0	14	1364.41	12.1823	0	1	;
/*	444	*/	22	37	37	0	1	-11	2	1	0	0	0	1	0	35.173	0	0	10	1391.95	15.7233	0	1	;
/*	445	*/	18	30	30	0	1	-5	2	0	0	1	0	1	0	8.6307	0	1	41	888.549	11.8851	0	1	;
/*	446	*/	18	37	37	0	1	-13	3	0	0	1	0	1	0	7.65636	0	1	27	896.209	10.913	0	1	;
/*	447	*/	18	38	38	0	1	-13	2	0	0	1	0	1	0	7.65636	0	1	20	901.969	11.8852	0	1	;
/*	448	*/	18	36	36	0	1	-10	2	0	0	1	0	1	0	3.8581	0	1	17	912.74	10.6057	0	1	;
/*	449	*/	18	30	30	0	1	-5	2	1	0	0	0	1	0	3.04425	0	1	16	951.116	11.8932	0	1	;
/*	450	*/	18	25	25	0	1	0	3	1	0	0	0	1	0	2.31934	0	1	16	953.918	11.3192	0	1	;
/*	451	*/	18	28	28	0	1	-4	2	0	0	1	0	1	0	2.31934	1	0	16	955.858	11.2913	0	1	;
/*	452	*/	18	30	30	0	1	-4	3	1	0	0	0	1	0	2.60243	0	1	15	957.915	11.467	0	1	;
/*	453	*/	18	33	33	0	1	-8	3	0	1	0	0	1	0	4.77341	0	1	15	958.266	11.6603	0	1	;
/*	454	*/	18	28	28	0	1	-4	3	0	1	0	0	1	0	10.5948	0	1	14	988.096	0.889402	0	1	;
/*	455	*/	18	38	38	0	1	-12	3	0	1	0	0	1	0	10.5948	0	1	13	992.207	6.49245	0	1	;
/*	456	*/	18	38	38	0	1	-13	2	0	1	0	0	1	0	29.8485	0	1	10	1015.07	9.46002	0	1	;
/*	457	*/	18	29	29	0	1	-4	2	1	0	0	0	1	0	50.3427	0	1	5	1057.66	7.64432	0	1	;
/*	458	*/	18	36	36	0	1	-10	2	1	0	0	0	1	0	14.2282	0	1	7	1135.9	5.68392	0	1	;
/*	459	*/	28	37	37	0	1	-10	3	0	1	0	0	1	0	6.45837	0	1	6	1136.42	17.1341	0	1	;
/*	460	*/	18	29	29	0	1	-3	2	0	1	0	0	1	0	6.45837	0	1	6	1136.5	22.4283	0	1	;
/*	461	*/	18	38	38	0	1	-13	2	0	1	0	0	1	0	21.9078	0	1	6	1158.35	11.402	0	1	;
/*	462	*/	18	39	39	0	1	-14	3	0	1	0	0	1	0	7.85947	0	1	7	1191.86	9.58928	0	1	;
/*	463	*/	18	40	40	0	1	-15	2	1	0	0	0	1	0	2.93029	0	1	15	1275.72	11.4659	0	1	;
/*	464	*/	18	38	38	0	1	-11	3	1	0	0	0	1	0	2.93029	0	1	16	1272.94	12.3214	0	1	;
/*	465	*/	18	29	29	0	1	-4	2	0	1	0	0	1	0	7.85947	0	1	8	1198.72	8.88306	0	1	;
/*	466	*/	18	28	28	0	1	-2	2	1	0	0	0	1	0	5.03636	0	1	15	1278	15.6275	0	1	;
/*	467	*/	18	30	30	0	1	-16	1	1	0	0	0	1	0	18.4607	1	0	51	872.363	13.5462	0	1	;
/*	468	*/	18	19	22	1	1	-13	2	0	0	1	0	1	0	3.8581	0	1	20	909.816	10.1468	0	1	;
/*	469	*/	18	19	22	1	1	-13	3	0	0	1	0	1	0	8.81572	0	1	16	944.424	10.8646	0	1	;
/*	470	*/	18	45	45	0	1	-13	3	1	0	0	0	1	0	5.03636	0	1	15	1282.48	15.3271	0	1	;
/*	471	*/	18	19	22	1	1	-13	3	0	1	0	0	1	0	8.86407	0	1	16	1291.03	14.9664	0	1	;
/*	472	*/	18	42	44	1	1	-16	1	1	0	0	0	1	0	18.7394	0	1	51	857.818	12.1669	0	1	;
/*	473	*/	25	34	37	1	1	-23	2	1	0	0	0	1	0	8.07916	0	1	16	920.819	6.12992	0	1	;
/*	474	*/	14	32	32	0	1	-5	3	1	0	0	0	1	0	5.85724	0	0	27	1143.02	17.2423	0	1	;
/*	475	*/	14	27	27	0	1	0	3	1	0	0	0	1	0	5.85724	0	0	25	1138.59	16.8366	0	1	;
/*	476	*/	14	28	28	0	1	-1	2	1	0	0	0	1	0	5.82605	0	0	24	1115.08	15.2656	0	1	;
/*	477	*/	14	28	28	0	1	-2	3	0	0	1	0	1	0	4.83866	0	0	24	1108.6	16.4157	0	1	;
/*	478	*/	14	32	32	0	1	-8	2	0	0	1	0	1	0	4.83866	0	0	23	1105	15.9825	0	1	;
/*	479	*/	14	30	30	0	1	-4	2	0	0	1	0	1	0	4.4344	0	0	25	1101.67	13.9416	0	1	;
/*	480	*/	14	31	31	0	1	-7	3	1	0	0	0	1	0	6.6061	0	0	31	1085.25	14.6463	0	1	;
/*	481	*/	14	27	27	0	1	-2	3	1	0	0	0	1	0	6.6061	0	0	30	1080.49	13.8378	0	1	;
/*	482	*/	14	38	38	0	1	-9	3	0	0	1	0	1	0	4.88668	1	0	41	1064.16	19.0329	0	1	;
/*	483	*/	14	30	30	0	1	-6	2	0	0	1	0	1	0	4.88668	0	0	39	1063.54	15.555	0	1	;
/*	484	*/	14	21	21	0	1	3	2	1	0	0	0	1	0	5.6816	0	0	36	1059.6	14.3729	0	1	;
/*	485	*/	14	28	28	0	1	-2	2	0	0	1	0	1	0	5.83189	1	0	39	1053.77	16.8292	0	1	;
/*	486	*/	14	28	28	0	1	-2	2	1	0	0	0	1	0	14.8613	0	0	38	1043.65	13.4406	0	1	;
/*	487	*/	14	28	28	0	1	-2	2	0	0	1	0	1	0	6.90853	1	0	37	1020.53	13.3281	0	1	;
/*	488	*/	14	28	28	0	1	-2	2	1	0	0	0	1	0	3.68368	0	0	32	1007.63	14.0937	0	1	;
/*	489	*/	14	35	35	0	1	-9	2	1	0	0	0	1	0	4.33057	0	0	30	1003.73	14.7949	0	1	;
/*	490	*/	14	22	22	0	1	2	2	1	0	0	0	1	0	6.43095	1	0	29	988.103	14.492	0	1	;
/*	491	*/	14	34	34	0	1	-7	2	1	0	0	0	1	0	7.37365	1	0	25	948.342	12.5421	0	1	;
/*	492	*/	14	28	28	0	1	-2	3	1	0	0	0	1	0	7.37365	1	0	26	942.308	12.5187	0	1	;
/*	493	*/	14	32	32	0	1	-2	2	0	0	1	0	1	0	8.39959	1	0	19	916.231	12.4935	0	1	;
/*	494	*/	14	40	40	0	1	-10	3	0	0	1	0	1	0	8.39959	1	0	21	907.838	17.5629	0	1	;
/*	495	*/	14	31	31	0	1	-4	3	1	0	0	0	1	0	24.8142	1	0	15	891.933	11.0426	0	1	;
/*	496	*/	14	32	32	0	1	-4	3	1	0	0	0	1	0	28.5084	0	0	16	848.286	9.96256	0	1	;
/*	497	*/	14	22	22	0	1	2	2	0	0	1	0	1	0	4.55518	1	0	12	797.887	9.05018	0	1	;
/*	498	*/	14	38	38	0	1	-12	2	1	0	0	0	1	0	4.55518	1	0	15	793.722	9.91841	0	1	;
/*	499	*/	14	39	39	0	1	-12	2	1	0	0	0	1	0	17.0655	1	0	22	779.714	10.534	0	1	;
/*	500	*/	14	28	30	1	1	-8	2	1	0	0	0	1	0	4.4344	0	0	26	1098.48	18.3193	0	1	;
/*	501	*/	14	35	35	0	1	-10	2	1	0	0	0	1	0	5.04439	0	0	35	1014.2	14.6865	0	1	;
/*	502	*/	14	41	41	0	1	-12	3	1	0	0	0	1	0	3.68368	1	0	32	1011.06	13.2473	0	1	;
/*	503	*/	14	25	25	0	1	0	2	0	0	1	0	1	0	6.43095	1	0	28	993.236	14.7335	0	1	;
/*	504	*/	14	41	43	1	1	-9	2	1	0	0	0	1	0	15.2415	1	0	24	975.812	14.1328	0	1	;
/*	505	*/	15	27	29	1	1	-9	1	1	0	0	0	1	0	25.476	0	0	18	871.206	10.7521	0	1	;
/*	506	*/	26	30	30	0	1	-6	3	1	0	0	0	1	0	2.57613	0	0	26	1118.14	17.398	0	1	;
/*	507	*/	28	30	30	0	1	-2	3	1	0	0	0	1	0	2.57613	0	0	28	1118.03	19.5243	0	1	;
/*	508	*/	28	30	32	1	1	-26	2	1	0	0	0	1	0	8.80545	1	0	38	992.823	23.6848	0	1	;
/*	509	*/	22	31	31	0	1	-5	3	1	0	0	0	1	0	40.5739	1	0	32	1171.47	23.7969	0	1	;
/*	510	*/	32	36	38	1	1	-28	2	1	0	0	0	1	0	13.0316	1	0	29	1133.7	30.1191	0	1	;
/*	511	*/	28	38	38	0	1	-19	2	1	0	0	0	1	0	8.80545	1	0	36	985.588	23.7078	0	1	;
/*	512	*/	28	38	38	0	1	-3	2	1	0	0	0	1	0	16.158	0	0	13	810.689	9.80973	0	1	;
/*	513	*/	30	31	31	0	1	-6	3	1	0	0	0	1	0	10.6859	1	0	40	1005.77	24.897	0	1	;
/*	514	*/	10	32	32	0	1	-7	2	0	0	1	0	1	0	7.07511	1	0	27	688.827	18.399	0	1	;
/*	515	*/	10	30	30	0	1	-5	2	0	0	1	0	1	0	7.07511	1	0	28	695.711	12.7424	0	1	;
/*	516	*/	10	30	30	0	1	-5	2	0	0	1	0	1	0	8.31382	1	0	32	706.98	19.7903	0	1	;
/*	517	*/	10	30	30	0	1	-6	2	0	0	1	0	1	0	5.61308	1	0	35	723.139	10.9386	0	1	;
/*	518	*/	10	25	25	0	1	0	3	0	0	1	0	1	0	5.61308	1	0	34	726.341	12.9509	0	1	;
/*	519	*/	10	29	29	0	1	-4	2	0	0	1	0	1	0	5.80295	1	0	36	732.07	10.5107	0	1	;
/*	520	*/	10	33	33	0	1	-8	3	0	0	1	0	1	0	16.1685	1	0	28	751.225	23.9676	0	1	;
/*	521	*/	10	29	29	0	1	-3	3	1	0	0	0	1	0	9.1351	1	0	32	770.573	8.57819	0	1	;
/*	522	*/	10	28	28	0	1	-1	3	1	0	0	0	1	0	9.12222	1	0	32	779.119	7.401	0	1	;
/*	523	*/	10	33	33	0	1	-8	3	0	0	1	0	1	0	7.48947	1	0	33	786.242	9.14139	0	1	;
/*	524	*/	10	32	32	0	1	-6	2	0	0	1	0	1	0	9.64128	1	0	30	782.913	23.7918	0	1	;
/*	525	*/	10	31	31	0	1	-6	2	0	0	1	0	1	0	9.64128	1	0	31	790.649	25.2964	0	1	;
/*	526	*/	10	34	34	0	1	-8	2	0	0	1	0	1	0	13.6747	1	0	38	817.024	8.43246	0	1	;
/*	527	*/	10	30	30	0	1	-6	3	0	0	1	0	1	0	12.3424	0	1	40	830.57	3.05728	0	1	;
/*	528	*/	10	29	29	0	1	-4	3	0	0	1	0	1	0	10.7779	1	0	40	828.739	13.6645	0	1	;
/*	529	*/	10	31	31	0	1	-5	2	0	0	1	0	1	0	7.6857	1	0	34	810.343	21.9956	0	1	;
/*	530	*/	10	25	25	0	1	-2	3	0	0	1	0	1	0	3.9904	1	0	35	815.552	19.939	0	1	;
/*	531	*/	10	30	30	0	1	-4	2	0	0	1	0	1	0	3.9904	1	0	36	817.189	17.7095	0	1	;
/*	532	*/	10	32	32	0	1	-8	2	0	0	1	0	1	0	9.19895	0	0	36	823.533	15.3927	0	1	;
/*	533	*/	10	35	35	0	1	-8	2	0	0	1	0	1	0	9.85187	1	0	40	837.787	12.4691	0	1	;
/*	534	*/	10	30	30	0	1	-4	3	0	0	1	0	1	0	9.85187	1	0	39	847.549	7.32032	0	1	;
/*	535	*/	10	29	29	0	1	-4	2	0	0	1	0	1	0	9.56756	1	0	41	858.499	11.429	0	1	;
/*	536	*/	10	30	30	0	1	-7	3	0	0	1	0	1	0	12.3737	1	0	37	855.772	23.099	0	1	;
/*	537	*/	10	29	29	0	1	-4	3	0	0	1	0	1	0	9.56756	1	0	41	866.225	10.9058	0	1	;
/*	538	*/	10	27	27	0	1	-2	3	0	0	1	0	1	0	10.537	1	0	40	874.625	10.5119	0	1	;
/*	539	*/	10	30	30	0	1	-6	2	0	0	1	0	1	0	8.76874	1	0	41	884.12	11.3369	0	1	;
/*	540	*/	10	30	30	0	1	-5	2	0	0	1	0	1	0	3.28798	1	0	37	876.22	22.9344	0	1	;
/*	541	*/	14	29	29	0	1	-4	3	0	0	1	0	1	0	3.28798	1	0	37	879.138	22.4294	0	1	;
/*	542	*/	10	22	22	0	1	1	2	0	0	1	0	1	0	6.01706	1	0	39	885.009	18.0609	0	1	;
/*	543	*/	10	26	26	0	1	-1	2	0	0	1	0	1	0	14.2002	1	0	39	889.293	19.0939	0	1	;
/*	544	*/	10	26	26	0	1	2	3	1	0	0	0	1	0	15.7574	1	0	40	903.038	19.9907	0	1	;
/*	545	*/	10	30	30	0	1	-5	2	0	0	1	0	1	0	7.01319	1	0	49	903.011	6.90609	0	1	;
/*	546	*/	10	25	25	0	1	-2	3	0	0	1	0	1	0	4.51468	1	0	47	906.604	8.99566	0	1	;
/*	547	*/	10	33	33	0	1	-7	3	0	0	1	0	1	0	17.2386	1	0	51	931.069	5.22844	0	1	;
/*	548	*/	10	26	26	0	1	-4	3	0	0	1	0	1	0	4.24371	1	0	39	943.564	21.1891	0	1	;
/*	549	*/	10	25	25	0	1	0	2	1	0	0	0	1	0	4.24371	1	0	40	947.723	22.3098	0	1	;
/*	550	*/	10	25	25	0	1	0	3	0	0	1	0	1	0	2.78714	1	0	47	955.653	11.0761	0	1	;
/*	551	*/	10	27	27	0	1	-2	2	1	0	0	0	1	0	2.18735	1	0	44	972.681	10.1994	0	1	;
/*	552	*/	10	33	33	0	1	-7	1	1	0	0	0	1	0	1.70194	1	0	46	979.278	12.7352	0	1	;
/*	553	*/	10	26	26	0	1	-2	3	0	0	1	0	1	0	4.67489	1	0	45	985.503	8.21704	0	1	;
/*	554	*/	10	25	25	0	1	0	2	0	0	1	0	1	0	5.06495	1	0	46	989.977	7.67542	0	1	;
/*	555	*/	10	30	30	0	1	-5	2	0	0	1	0	1	0	4.93907	1	0	40	989.031	12.9844	0	1	;
/*	556	*/	10	34	34	0	1	-8	3	0	0	1	0	1	0	2.22655	1	0	40	994.021	10.5452	0	1	;
/*	557	*/	10	32	32	0	1	-8	2	1	0	0	0	1	0	2.22655	1	0	43	993.645	8.93847	0	1	;
/*	558	*/	10	30	30	0	1	-8	2	0	0	1	0	1	0	2.57613	1	0	41	1001.39	7.88156	0	1	;
/*	559	*/	10	29	29	0	1	-4	2	0	0	1	0	1	0	19.6576	1	0	39	1016.61	12.8621	0	1	;
/*	560	*/	10	33	33	0	1	-8	3	0	0	1	0	1	0	8.87528	0	0	31	1019.1	27.6133	0	1	;
/*	561	*/	10	32	32	0	1	-8	3	1	0	0	0	1	0	7.44094	1	0	41	1046.78	9.52595	0	1	;
/*	562	*/	10	30	30	0	1	-4	3	0	0	1	0	1	0	7.44094	1	0	38	1047.72	15.1112	0	1	;
/*	563	*/	10	30	30	0	1	-7	2	0	0	1	0	1	0	12.5994	1	0	20	1094.3	14.8585	0	1	;
/*	564	*/	10	30	30	0	1	-5	3	0	0	1	0	1	0	12.5994	1	0	22	1104.57	9.54725	0	1	;
/*	565	*/	10	30	30	0	1	-8	1	0	0	1	0	1	0	13.5142	1	0	20	1118.58	5.14239	0	1	;
/*	566	*/	10	29	29	0	1	-4	3	0	0	1	0	1	0	13.5142	1	0	16	1129.71	5.9309	0	1	;
/*	567	*/	14	29	29	0	1	-3	2	1	0	0	0	1	0	4.48835	1	0	33	793.729	5.84618	0	1	;
/*	568	*/	14	26	26	0	1	-2	3	1	0	0	0	1	0	7.19953	1	0	36	866.16	18.1755	0	1	;
/*	569	*/	14	35	35	0	1	-10	2	0	0	1	0	1	0	5.1191	0	0	37	875.26	16.7399	0	1	;
/*	570	*/	38	41	41	0	1	-15	2	0	0	1	0	1	0	8.31382	1	0	34	714.795	13.2211	0	1	;
/*	571	*/	30	47	47	0	1	-22	2	1	0	0	0	1	0	16.8289	1	0	32	755.592	6.65805	0	1	;
/*	572	*/	26	44	44	0	1	-9	2	1	0	0	0	1	0	8.87528	1	0	31	1027.89	19.542	0	1	;
/*	573	*/	26	32	32	0	1	-11	2	1	0	0	0	1	0	15.5924	1	0	34	966.096	15.7809	0	1	;
/*	574	*/	22	34	34	0	1	-9	2	1	0	0	0	1	0	17.7957	0	0	16	1071.2	6.00945	0	1	;
/*	575	*/	14	28	28	0	1	0	2	1	0	0	0	1	0	5.1191	1	0	36	871.47	17.3241	0	1	;
/*	576	*/	10	11	14	1	1	-4	3	1	0	0	0	1	0	6.47536	1	0	47	953.276	7.42181	0	1	;
/*	577	*/	10	40	42	1	1	-6	3	1	0	0	0	1	0	2.78714	1	0	47	958.378	9.06379	0	1	;
/*	578	*/	10	35	38	1	1	-8	1	1	0	0	0	1	0	2.18735	1	0	47	974.864	9.08591	0	1	;
/*	579	*/	10	44	47	1	1	-8	1	1	0	0	0	1	0	1.70194	1	0	46	980.874	11.35	0	1	;
/*	580	*/	14	26	28	1	1	-12	1	1	0	0	0	1	0	8.47151	1	0	42	1043.96	4.49155	0	1	;
/*	581	*/	14	22	26	1	1	-12	1	1	0	0	0	1	0	14.473	1	0	35	1060.81	13.05	0	1	;
/*	582	*/	10	30	30	0	1	-8	1	0	0	1	0	1	0	2.57613	1	0	44	1001.5	5.68838	0	1	;
/*	583	*/	10	30	32	1	1	-8	1	1	0	0	0	1	0	4.51468	1	0	47	910.575	4.9896	0	1	;
/*	584	*/	26	31	31	0	1	-12	2	0	0	1	0	1	0	16.1685	1	0	35	739.916	20.4977	0	1	;
/*	585	*/	32	41	41	0	1	-18	2	1	0	0	0	1	0	4.48835	1	0	34	796.648	7.51154	0	1	;
/*	586	*/	30	36	38	1	1	-26	2	1	0	0	0	1	0	11.1211	1	0	37	827.05	23.9131	0	1	;
/*	587	*/	30	32	35	1	1	-26	2	1	0	0	0	1	0	17.889	1	0	30	1077.95	7.66983	0	1	;
/*	588	*/	22	33	35	1	1	-4	2	1	0	0	0	1	0	11.085	0	0	36	833.305	16.0985	0	1	;
/*	589	*/	22	33	33	0	1	-8	2	1	0	0	0	1	0	11.6295	1	0	24	1060.1	13.3825	0	1	;
/*	590	*/	22	26	26	0	1	-1	2	1	0	0	0	1	0	11.8057	0	0	37	843.418	16.3374	0	1	;
/*	591	*/	22	32	32	0	1	-9	2	1	0	0	0	1	0	11.6295	0	0	27	1049.87	13.6652	0	1	;
/*	592	*/	22	26	26	0	1	-2	2	1	0	0	0	1	0	10.7561	0	0	38	920.087	16.488	0	1	;
/*	593	*/	22	32	32	0	1	-7	2	1	0	0	0	1	0	12.5177	0	0	36	953.601	16.7441	0	1	;
/*	594	*/	10	35	35	0	1	-8	2	0	1	0	0	1	0	4.48076	1	0	62	613.209	5.77126	0	1	;
/*	595	*/	10	33	33	0	1	-8	2	0	1	0	0	1	0	5.84941	1	0	56	611.536	15.6927	0	1	;
/*	596	*/	10	32	32	0	1	-5	3	0	1	0	0	1	0	8.73326	1	0	43	516.756	15.4102	0	1	;
/*	597	*/	10	26	26	0	1	0	1	0	1	0	0	1	0	7.04732	1	0	49	524.208	15.2002	0	1	;
/*	598	*/	10	29	29	0	1	-5	3	0	1	0	0	1	0	5.23135	1	0	53	530.418	14.6329	0	1	;
/*	599	*/	10	32	32	0	1	-7	2	0	0	1	0	1	0	5.23135	1	0	53	532.768	9.56898	0	1	;
/*	600	*/	10	30	30	0	1	-6	2	0	1	0	0	1	0	5.8145	1	0	55	536.375	12.0732	0	1	;
/*	601	*/	10	26	26	0	1	-2	2	0	1	0	0	1	0	4.94742	1	0	56	541.492	11.8677	0	1	;
/*	602	*/	10	30	30	0	1	-6	2	0	1	0	0	1	0	4.94742	1	0	56	545.023	12.7613	0	1	;
/*	603	*/	10	30	30	0	1	-6	2	0	1	0	0	1	0	7.40542	1	0	57	547.674	15.176	0	1	;
/*	604	*/	10	31	31	0	1	-6	2	0	1	0	0	1	0	3.20618	1	0	55	554.775	10.0798	0	1	;
/*	605	*/	10	34	34	0	1	-8	2	0	1	0	0	1	0	3.20618	1	0	55	557.455	10.2082	0	1	;
/*	606	*/	10	29	29	0	1	-3	3	0	0	1	0	1	0	3.34914	1	0	56	560.251	10.6017	0	1	;
/*	607	*/	10	38	38	0	1	-8	3	0	1	0	0	1	0	3.34914	1	0	58	563.179	10.614	0	1	;
/*	608	*/	10	27	27	0	1	-2	3	0	0	1	0	1	0	3.89335	1	0	59	563.793	13.9144	0	1	;
/*	609	*/	10	26	26	0	1	-2	3	0	1	0	0	1	0	3.35635	1	0	60	568.58	10.8574	0	1	;
/*	610	*/	10	30	30	0	1	-5	2	0	0	1	0	1	0	2.82215	1	0	60	569.821	12.758	0	1	;
/*	611	*/	10	25	25	0	1	0	2	0	1	0	0	1	0	1.68839	1	0	62	572.628	11.7024	0	1	;
/*	612	*/	10	32	32	0	1	-7	2	0	1	0	0	1	0	1.68839	1	0	62	573.783	11.684	0	1	;
/*	613	*/	10	29	29	0	1	-3	2	0	0	1	0	1	0	3.71988	1	0	62	579.457	7.52175	0	1	;
/*	614	*/	10	26	26	0	1	-1	3	0	1	0	0	1	0	3.44019	1	0	60	582.613	7.23939	0	1	;
/*	615	*/	10	29	29	0	1	-3	2	0	1	0	0	1	0	5.12352	1	0	61	588.012	2.99291	0	1	;
/*	616	*/	10	27	27	0	1	0	3	0	0	1	0	1	0	6.97438	1	0	63	594.982	1.79192	0	1	;
/*	617	*/	10	29	29	0	1	-3	2	0	1	0	0	1	0	8.23341	1	0	60	594.817	8.99353	0	1	;
/*	618	*/	10	30	30	0	1	-5	3	0	1	0	0	1	0	6.40744	1	0	63	602.946	5.55485	0	1	;
/*	619	*/	10	30	30	0	1	-4	2	0	1	0	0	1	0	4.48076	1	0	62	617.084	1.95189	0	1	;
/*	620	*/	10	31	31	0	1	-3	3	0	1	0	0	1	0	7.97284	1	0	54	618.841	14.059	0	1	;
/*	621	*/	10	33	33	0	1	-8	2	1	0	0	0	1	0	5.62498	1	0	58	632.792	5.26279	0	1	;
/*	622	*/	10	30	30	0	1	-6	3	1	0	0	0	1	0	5.43753	1	0	59	660.859	7.07393	0	1	;
/*	623	*/	14	38	38	0	1	-11	2	0	1	0	0	1	0	5.62498	1	0	57	627.174	10.3026	0	1	;
/*	624	*/	14	38	38	0	1	-12	2	0	1	0	0	1	0	3.97764	1	0	60	614.022	10.0753	0	1	;
/*	625	*/	18	25	25	0	1	2	3	0	1	0	0	1	0	45.5876	0	0	7	372.423	35.7511	0	1	;
/*	626	*/	18	38	38	0	1	-12	2	1	0	0	0	1	0	2.5904	1	0	61	583.807	2.25779	0	1	;
/*	627	*/	18	41	41	0	1	-16	2	0	1	0	0	1	0	6.55978	1	0	56	619.326	8.34942	0	1	;
/*	628	*/	18	45	45	0	1	-16	2	1	0	0	0	1	0	4.23851	1	0	61	601.965	11.8536	0	1	;
/*	629	*/	18	41	41	0	1	-16	2	0	1	0	0	1	0	1.50382	1	0	59	607.405	10.5538	0	1	;
/*	630	*/	18	38	38	0	1	-11	2	0	1	0	0	1	0	3.91642	1	0	58	610.061	13.5575	0	1	;
/*	631	*/	26	46	46	0	1	-24	2	1	0	0	0	1	0	14.3541	1	0	3	331.502	41.5719	0	1	;
/*	632	*/	26	47	47	0	1	-22	3	0	1	0	0	1	0	17.0226	1	0	59	475.571	21.6522	0	1	;
/*	633	*/	26	47	47	0	1	-22	3	0	1	0	0	1	0	11.0517	1	0	17	460.662	22.8432	0	1	;
/*	634	*/	26	39	39	0	1	-13	2	1	0	0	0	1	0	20.2391	1	0	19	494.117	18.4976	0	1	;
/*	635	*/	26	38	41	1	1	-24	1	1	0	0	0	1	0	6.01609	1	0	31	573.771	5.47518	0	1	;
/*	636	*/	30	47	47	0	1	-24	2	0	1	0	0	1	0	7.31409	1	0	61	570.396	1.80182	0	1	;
/*	637	*/	33	47	47	0	1	-24	2	1	0	0	0	1	0	11.0517	0	1	60	468.836	12.169	0	1	;
/*	638	*/	10	14	18	1	1	-6	3	1	0	0	0	1	0	22.3296	0	1	17	433.637	8.02012	0	1	;
/*	639	*/	14	28	30	1	1	-12	1	1	0	0	0	1	0	22.3296	0	1	11	436.625	25.9864	0	1	;
/*	640	*/	14	28	30	1	1	-12	1	1	0	0	0	1	0	2.5904	1	0	11	583.169	4.38003	0	1	;
/*	641	*/	14	28	30	1	1	-12	1	1	0	0	0	1	0	5.43753	1	0	61	656.715	1.89237	0	1	;
/*	642	*/	18	44	44	0	1	-13	3	1	0	0	0	1	0	14.3541	1	0	59	323.218	36.5175	0	1	;
/*	643	*/	26	33	35	1	1	-24	1	1	0	0	0	1	0	1.50382	1	0	3	606.195	10.1924	0	1	;
/*	644	*/	10	28	28	0	1	-4	2	0	1	0	0	1	0	5.10324	1	0	61	1229.08	9.33809	0	1	;
/*	645	*/	10	32	32	0	1	-6	2	0	1	0	0	1	0	5.10324	1	0	23	1234.17	5.03	0	1	;
/*	646	*/	10	26	26	0	1	-3	3	0	1	0	0	1	0	5.65693	1	0	22	1237.73	3.68323	0	1	;
/*	647	*/	10	26	26	0	1	-2	3	0	1	0	0	1	0	3.2239	1	0	22	1238.78	8.0823	0	1	;
/*	648	*/	10	32	32	0	1	-7	2	0	1	0	0	1	0	3.2239	1	0	23	1240.35	8.15921	0	1	;
/*	649	*/	10	28	28	0	1	-3	2	0	1	0	0	1	0	4.17023	1	0	22	1243.19	5.8923	0	1	;
/*	650	*/	10	28	28	0	1	-6	2	1	0	0	0	1	0	4.35392	1	0	23	1249.53	2.59822	0	1	;
/*	651	*/	10	31	31	0	1	-6	2	1	0	0	0	1	0	2.66744	1	0	23	1247.44	7.33882	0	1	;
/*	652	*/	10	28	28	0	1	-6	2	0	1	0	0	1	0	2.66744	1	0	23	1248.52	7.24992	0	1	;
/*	653	*/	10	30	30	0	1	-4	2	0	1	0	0	1	0	3.88044	1	0	23	1250.84	6.46339	0	1	;
/*	654	*/	10	32	32	0	1	-6	3	0	1	0	0	1	0	2.88707	1	0	23	1250.11	9.18339	0	1	;
/*	655	*/	10	32	32	0	1	-7	3	0	1	0	0	1	0	8.72726	1	0	23	1257.43	8.57223	0	1	;
/*	656	*/	10	32	32	0	1	-7	2	0	1	0	0	1	0	5.49848	1	0	24	1293.27	7.49212	0	1	;
/*	657	*/	26	39	39	0	1	-11	3	0	1	0	0	1	0	10.3244	1	0	29	1275.08	10.9723	0	1	;
/*	658	*/	26	40	40	0	1	-18	2	0	1	0	0	1	0	14.807	1	0	26	1265.34	9.34221	0	1	;
/*	659	*/	26	46	46	0	1	-22	2	0	1	0	0	1	0	2.88707	1	0	26	1249.94	9.01329	0	1	;
/*	660	*/	26	35	35	0	1	-11	2	0	1	0	0	1	0	4.42547	1	0	23	1238.09	10.4432	0	1	;
/*	661	*/	28	38	38	0	1	-9	2	0	1	0	0	1	0	6.88954	1	0	23	1241.91	7.492	0	1	;
/*	662	*/	10	40	42	1	1	-8	2	0	1	0	0	1	0	5.49848	1	0	24	1296.79	6.32119	0	1	;
/*	663	*/	10	31	31	0	1	-5	2	0	1	0	0	1	0	30.5882	1	0	26	1357.53	5.85311	0	1	;
/*	664	*/	10	31	31	0	1	-6	2	1	0	0	0	1	0	32.0375	1	0	14	1344.96	9.96312	0	1	;
/*	665	*/	10	18	22	1	1	-8	2	0	0	1	0	1	0	24.5759	1	0	16	1377.55	7.28125	0	1	;
/*	666	*/	18	20	22	1	1	-16	1	1	0	0	0	1	0	24.5759	1	0	6	1389.46	7.83102	0	1	;
/*	667	*/	10	29	29	0	1	-2	2	0	1	0	0	1	0	4.99963	1	0	5	1312.01	6.832	0	1	;
/*	668	*/	10	35	35	0	1	-7	2	0	1	0	0	1	0	1.8501	1	0	19	1318.64	5.49883	0	1	;
/*	669	*/	10	34	34	0	1	-8	2	0	1	0	0	1	0	1.8501	1	0	18	1318.99	5.98322	0	1	;
/*	670	*/	18	38	38	0	1	-13	2	1	0	0	0	1	0	4.48836	1	0	18	1316.39	5.18672	0	1	;
/*	671	*/	18	31	31	0	1	-5	2	1	0	0	0	1	0	6.0441	1	0	18	1322.54	7.88312	0	1	;
/*	672	*/	32	49	49	0	1	-24	2	0	0	1	0	1	0	7.99303	1	0	19	821.868	21.8396	0	1	;
/*	673	*/	26	49	49	0	1	-26	2	1	0	0	0	1	0	3.91642	1	0	22	606.145	14.9724	0	1	;
/*	674	*/	5	30	30	0	1	-4	3	0	0	0	0	1	0	11.8157	1	0	12	954.168	11.3712	0	0	;
/*	675	*/	5	12	16	1	1	-2	2	0	0	0	0	1	0	3.62573	1	0	22	1331.79	12.4372	0	0	;
/*	676	*/	5	12	16	1	1	-4	3	1	0	0	0	1	0	3.62573	1	0	23	1328.31	11.0912	0	0	;
/*	677	*/	5	12	16	1	1	-2	3	1	0	0	0	1	0	3.99662	1	0	23	1336.37	11.6474	0	0	;
/*	678	*/	5	32	32	0	1	-4	3	0	0	0	0	1	0	4.11689	1	0	24	1280.4	17.1592	0	0	;
/*	679	*/	8	32	32	0	1	-7	2	0	0	0	0	1	0	10.1217	1	0	23	1052.86	12.3086	0	0	;
/*	680	*/	8	30	30	0	1	-7	2	0	0	0	0	1	0	11.8157	1	0	13	962.968	11.0318	0	0	;
/*	681	*/	8	10	12	1	1	-7	1	1	0	0	0	1	0	12.0066	1	0	26	1303.21	12.608	0	0	;
/*	682	*/	8	10	12	1	1	-7	1	1	0	0	0	1	0	12.0066	1	0	27	1291.21	15.7677	0	0	;
/*	683	*/	12	37	37	0	1	-11	1	0	0	0	0	1	0	6.85452	1	0	16	1420.25	9.32126	0	0	;
/*	684	*/	12	41	41	0	1	-11	3	0	0	0	0	1	0	7.66241	1	0	25	1343.91	13.1819	0	0	;
/*	685	*/	12	16	20	1	1	-11	2	0	0	1	0	1	0	4.11689	1	0	24	1282.51	21.2715	0	0	;
/*	686	*/	12	34	34	0	1	-9	2	0	0	0	0	1	0	5.96961	1	0	19	1144.11	12.0572	0	0	;
/*	687	*/	12	16	20	1	1	-9	2	0	0	0	0	1	0	118.562	1	0	1	675.527	9.59968	0	0	;
/*	688	*/	20	41	41	0	1	-17	2	0	0	0	0	1	0	8.21435	1	0	18	1243.95	16.1622	0	0	;
/*	689	*/	24	43	44	1	1	-20	2	0	0	0	0	1	0	12.5524	1	0	13	943.717	13.1967	0	0	;
/*	690	*/	24	43	44	1	1	-23	2	0	1	0	0	1	0	30.3084	1	0	20	1021.75	15.4896	0	0	;
/*	691	*/	24	43	44	1	1	-20	2	0	0	0	0	1	0	10.1217	1	0	23	1045.45	14.0811	0	0	;
/*	692	*/	24	43	44	1	1	-20	2	0	1	0	0	1	0	31.1206	1	0	25	1081.55	11.4508	0	0	;
/*	693	*/	24	43	44	1	1	-22	1	0	1	0	0	1	0	15.8954	1	0	20	1215.4	6.96553	0	0	;
/*	694	*/	24	43	44	1	1	-20	2	0	0	0	0	1	0	6.48595	1	0	19	1235.77	9.9074	0	0	;
/*	695	*/	24	43	44	1	1	-20	2	0	0	0	0	1	0	6.85452	1	0	15	1426.51	13.8475	0	0	;
/*	696	*/	5	28	28	0	1	-4	3	0	0	1	0	1	0	15.1587	1	0	22	1113.5	6.72085	0	0	;
/*	697	*/	12	35	35	0	1	-11	2	0	0	0	0	1	0	15.1587	1	0	22	1108.28	14.9668	0	0	;
/*	698	*/	5	28	28	0	1	-4	2	0	0	0	0	1	0	5.96961	1	0	19	1138.46	10.5341	0	0	;
/*	699	*/	28	36	37	1	1	-27	2	0	0	0	0	1	0	3.99662	1	0	23	1336.65	11.8776	0	0	;
/*	700	*/	28	43	44	1	1	-25	2	0	0	0	0	1	0	6.48595	1	0	19	1229.53	7.06197	0	0	;
/*	701	*/	31	43	44	1	1	-28	2	1	0	0	0	1	0	16.5875	1	0	20	1157.12	10.7155	0	0	;
/*	702	*/	20	40	40	0	1	-17	2	0	1	0	0	1	0	65.824	0	0	2	745.047	13.3665	0	0	;
/*	703	*/	20	41	41	0	1	-17	2	0	0	0	0	1	0	34.8782	0	0	6	800.719	14.4189	0	0	;
/*	704	*/	5	24	24	0	1	0	3	1	0	0	0	1	0	21.9144	0	0	6	829.376	13.4516	0	0	;
/*	705	*/	5	9	12	1	1	-4	2	0	0	1	0	1	0	19.7534	1	0	18	1138.84	7.47248	0	0	;
/*	706	*/	20	43	43	0	1	-19	2	0	0	1	0	1	0	19.7534	1	0	18	1138.84	7.47248	0	0	;
/*	707	*/	12	34	34	0	1	-11	2	0	1	0	0	1	0	21.9144	0	0	7	846.287	11.5268	0	0	;
/*	708	*/	28	43	44	1	1	-26	1	0	0	0	0	1	0	9.0815	0	0	10	868.673	11.1256	0	0	;
/*	709	*/	5	34	35	1	1	-4	1	0	0	0	0	1	0	9.0815	1	0	11	877.734	16.7636	0	0	;
/*	710	*/	12	28	31	1	1	-11	1	0	0	1	0	1	0	24.2633	0	0	12	897.289	16.0124	0	0	;
/*	711	*/	12	23	24	1	1	-9	2	0	0	1	0	1	0	10.1046	0	0	23	971.611	17.8372	0	0	;
/*	712	*/	31	43	44	1	1	-30	1	0	0	0	0	1	0	16.0341	0	0	13	943.434	17.0678	0	0	;
/*	713	*/	31	40	43	1	1	-28	2	0	0	0	0	1	0	16.0341	0	0	20	957.137	18.3285	0	0	;
/*	714	*/	24	40	40	0	1	-18	2	0	1	0	0	1	0	2.58498	1	0	22	982.097	20.3215	0	0	;
/*	715	*/	20	41	41	0	1	-17	2	1	0	0	0	1	0	2.58498	0	0	23	979.874	17.9514	0	0	;
/*	716	*/	5	30	30	0	1	-4	3	0	0	1	0	1	0	15.0087	0	0	24	1011.73	15.9817	0	0	;
/*	717	*/	5	28	28	0	1	0	3	0	0	1	0	1	0	5.05487	0	0	29	1053.68	33.4597	0	0	;
/*	718	*/	5	28	28	0	1	-4	2	1	0	0	0	1	0	5.35159	0	0	26	1027.07	15.4366	0	0	;
/*	719	*/	20	23	24	1	1	-17	2	0	0	0	0	1	0	5.35159	0	0	25	1024.22	17.317	0	0	;
/*	720	*/	31	43	44	1	1	-28	2	0	0	0	0	1	0	15.5324	0	0	27	1035.88	10.6016	0	0	;
/*	721	*/	8	32	32	0	1	-7	2	0	0	1	0	1	0	5.05487	0	0	29	1053.36	32.2238	0	0	;
/*	722	*/	8	16	20	1	1	-7	1	1	0	0	0	1	0	7.78513	0	0	27	1093.2	33.0894	0	0	;
/*	723	*/	5	28	28	0	1	0	3	0	0	1	0	1	0	7.78513	0	0	28	1085.43	32.6191	0	0	;
/*	724	*/	32	55	55	0	1	-31	3	0	0	1	0	1	0	7.78513	0	0	28	1085.43	32.6191	0	0	;
/*	725	*/	31	41	41	0	1	-13	3	0	0	1	0	1	0	17.4289	0	1	26	1076.2	15.2644	0	0	;
/*	726	*/	5	28	28	0	1	-2	3	1	0	0	0	1	0	7.53581	1	0	20	1125.84	27.0377	0	0	;
/*	727	*/	5	28	28	0	1	0	3	0	0	1	0	1	0	7.53581	0	0	21	1119.02	33.4298	0	0	;
/*	728	*/	5	8	12	1	1	0	3	1	0	0	0	1	0	10.7219	1	0	21	1109.27	32.3928	0	0	;
/*	729	*/	16	26	30	1	1	-15	1	1	0	0	0	1	0	10.5572	0	0	20	1125.68	26.1278	0	0	;
/*	730	*/	5	16	20	1	1	-2	3	1	0	0	0	1	0	29.4038	1	0	20	1172.49	29.4242	0	0	;
/*	731	*/	5	28	28	0	1	-2	2	0	0	1	0	1	0	29.4038	1	0	25	1197.53	31.818	0	0	;
/*	732	*/	5	9	12	1	1	-2	2	0	0	1	0	1	0	15.9657	1	0	25	1230.63	38.0582	0	0	;
/*	733	*/	5	27	27	0	1	-4	2	1	0	0	0	1	0	15.9657	1	0	22	1214.91	27.0366	0	0	;
/*	734	*/	5	28	28	0	1	-4	3	0	0	1	0	1	0	17.9816	0	0	32	1263.14	39.8296	0	0	;
/*	735	*/	24	43	44	1	1	-20	2	0	0	0	0	1	0	2.48265	1	0	31	1254.98	26.1104	0	0	;
/*	736	*/	8	10	12	1	1	-5	2	1	0	0	0	1	0	2.48265	1	0	31	1257.24	26.5165	0	0	;
/*	737	*/	5	30	30	0	1	-4	3	0	1	0	0	1	0	5.85654	1	0	28	1294.95	20.2784	0	0	;
/*	738	*/	5	12	16	1	1	0	3	1	0	0	0	1	0	5.85654	1	0	28	1291.85	26.1124	0	0	;
/*	739	*/	5	16	20	1	1	0	3	0	0	0	0	1	0	14.8521	1	0	25	1294.39	38.6028	0	0	;
/*	740	*/	24	29	31	1	1	-23	1	1	0	0	0	1	0	24.3445	1	0	25	1315.81	24.7347	0	0	;
/*	741	*/	12	40	40	0	1	-11	2	0	1	0	0	1	0	14.8521	1	0	26	1302.56	32.8016	0	0	;
/*	742	*/	8	10	12	1	1	-7	1	1	0	0	0	1	0	17.8132	1	0	27	1338.01	27.8495	0	0	;
/*	743	*/	8	10	12	1	1	-7	1	1	0	0	0	1	0	10.2809	1	0	24	1313.95	28.749	0	0	;
/*	744	*/	8	10	12	1	1	-5	2	1	0	0	0	1	0	16.6508	1	0	18	1379.39	26.8287	0	0	;
/*	745	*/	8	10	12	1	1	-7	1	1	0	0	0	1	0	16.6508	1	0	22	1382.58	39.6757	0	0	;
/*	746	*/	8	20	24	1	1	-5	2	1	0	0	0	1	0	13.3399	1	0	16	1402.26	24.7814	0	0	;
/*	747	*/	8	30	30	0	1	-5	2	0	0	1	0	1	0	13.3399	1	0	16	1408.97	18.4457	0	0	;
/*	748	*/	5	28	28	0	1	-2	3	1	0	0	0	1	0	10.2809	1	0	25	1322.96	37.8612	0	0	;
/*	749	*/	5	28	28	0	1	-2	3	0	0	1	0	1	0	15.5542	0	0	26	1344.57	37.0187	0	0	;
/*	750	*/	5	28	28	0	1	-4	2	1	0	0	0	1	0	15.5542	1	0	24	1346.68	32.7627	0	0	;
/*	751	*/	5	24	24	0	1	-2	3	0	1	0	0	1	0	15.046	0	0	15	1414.12	34.2906	0	0	;
/*	752	*/	5	8	11	1	1	-4	2	1	0	0	0	1	0	15.046	1	0	17	1399.15	38.3139	0	0	;
/*	753	*/	20	41	41	0	1	-7	3	0	0	1	0	1	0	10.8467	1	0	14	1442.53	33.1793	0	0	;
/*	754	*/	12	37	37	0	1	-11	3	0	0	1	0	1	0	10.8467	1	0	14	1434.51	22.7598	0	0	;
/*	755	*/	5	28	28	0	1	-2	3	0	0	1	0	1	0	21.5736	1	0	15	1461.15	33.6236	0	0	;
/*	756	*/	5	12	16	1	1	-4	2	1	0	0	0	1	0	76.1364	1	0	4	1530.13	21.0035	0	0	;
/*	757	*/	9	20	24	1	1	-6	2	1	0	0	0	1	0	40.6475	1	0	13	1386.74	6.64669	0	0	;
/*	758	*/	9	11	12	1	1	-8	1	1	0	0	0	1	0	11.0204	1	0	9	1443.74	6.80273	0	0	;
/*	759	*/	9	11	12	1	1	-8	2	1	0	0	0	1	0	11.0204	1	0	8	1454.6	6.43163	0	0	;
/*	760	*/	9	12	16	1	1	-6	2	1	0	0	0	1	0	38.297	1	0	16	1226.46	7.9219	0	0	;
/*	761	*/	13	37	37	0	1	-13	2	1	0	0	0	1	0	6.24492	1	0	11	1177.48	5.79921	0	0	;
/*	762	*/	13	15	16	1	1	-6	2	1	0	0	0	1	0	6.24492	1	0	10	1178.65	9.71985	0	0	;
/*	763	*/	9	30	30	0	1	-6	3	1	0	0	0	1	0	16.6463	1	0	10	1192.82	9.57994	0	0	;
/*	764	*/	5	30	30	0	1	-2	3	0	0	1	0	1	0	88.7155	1	0	2	349.355	4.95807	0	0	;
/*	765	*/	6	8	12	1	1	-3	3	1	0	0	0	1	0	88.7155	1	0	3	294.456	7.3202	0	0	;
/*	766	*/	6	8	12	1	1	-3	3	1	0	0	0	1	0	33.533	1	0	3	259.233	20.6275	0	0	;
/*	767	*/	6	7	8	1	1	-5	1	0	0	1	0	1	0	33.533	1	0	2	290.339	10.6878	0	0	;
/*	768	*/	20	34	37	1	1	-17	3	0	0	1	0	1	0	134.89	1	0	1	439.064	16.3041	0	0	;
/*	769	*/	20	34	37	1	1	-19	3	0	0	1	0	1	0	22.796	1	0	13	550.887	9.90116	0	0	;
/*	770	*/	6	20	24	1	1	-4	2	1	0	0	0	1	0	8.75559	1	0	14	573.62	9.43139	0	0	;
/*	771	*/	6	28	28	0	1	-4	3	1	0	0	0	1	0	6.3947	1	0	15	580.616	6.95863	0	0	;
/*	772	*/	6	8	12	1	1	-1	3	1	0	0	0	1	0	3.70628	1	0	15	583.651	9.88665	0	0	;
/*	773	*/	6	8	12	1	1	-1	2	1	0	0	0	1	0	3.07682	1	0	15	587.217	8.70442	0	0	;
/*	774	*/	6	8	12	1	1	-1	3	1	0	0	0	1	0	6.9501	0	0	15	589.807	12.5617	0	0	;
/*	775	*/	6	28	28	0	1	-3	2	1	0	0	0	1	0	8.66757	1	0	15	602.273	7.51417	0	0	;
/*	776	*/	6	28	30	1	1	-3	2	1	0	0	0	1	0	0.781737	1	0	15	609.411	7.6128	0	0	;
/*	777	*/	8	12	16	1	1	-7	2	1	0	0	0	1	0	11.7236	1	0	15	638.428	7.33015	0	0	;
/*	778	*/	8	32	32	0	1	-7	2	1	0	0	0	1	0	0.781737	1	0	15	609.568	8.16191	0	0	;
/*	779	*/	8	32	32	0	1	-7	1	1	0	0	0	1	0	3.07682	1	0	15	590.18	6.34561	0	0	;
/*	780	*/	6	8	12	1	1	-5	1	1	0	0	0	1	0	3.73694	1	0	15	625.148	11.0246	0	0	;
/*	781	*/	6	8	12	1	1	-1	3	1	0	0	0	1	0	3.73694	0	0	15	626.93	11.8215	0	0	;
/*	782	*/	6	20	24	1	1	-5	2	1	0	0	0	1	0	9.06175	1	0	15	650.541	8.80677	0	0	;
/*	783	*/	6	27	27	0	1	-3	3	0	0	1	0	1	0	9.06175	0	0	15	656.226	11.4801	0	0	;
/*	784	*/	6	30	30	0	1	-1	3	0	0	1	0	1	0	50.7722	1	0	15	728.44	6.90836	0	0	;
/*	785	*/	24	27	28	1	1	-23	1	1	0	0	0	1	0	16.7061	1	0	17	679.081	8.38479	0	0	;
/*	786	*/	24	41	41	0	1	-20	2	0	0	1	0	1	0	3.37965	1	0	14	678.935	8.36319	0	0	;
/*	787	*/	24	40	40	0	1	-20	2	0	0	1	0	1	0	14.0355	1	0	21	691.646	6.74015	0	0	;
/*	788	*/	16	41	41	0	1	-15	2	0	0	1	0	1	0	3.37965	1	0	14	682.273	9.43033	0	0	;
/*	789	*/	24	48	48	0	1	-23	3	1	0	0	0	1	0	23.7283	1	0	34	754.501	9.54012	0	0	;
/*	790	*/	6	8	12	1	1	-5	1	1	0	0	0	1	0	10.2282	0	0	34	764.305	14.4779	0	0	;
/*	791	*/	8	10	12	1	1	-7	1	1	0	0	0	1	0	10.2282	1	0	35	768.547	9.15227	0	0	;
/*	792	*/	5	34	34	0	1	-4	3	1	0	0	0	1	0	10.6756	1	0	26	860.168	10.2542	0	0	;
/*	793	*/	5	27	27	0	1	-4	2	0	0	1	0	1	0	10.6756	1	0	28	869.715	5.80549	0	0	;
/*	794	*/	5	31	31	0	1	-4	2	1	0	0	0	1	0	5.72259	1	0	23	872.555	6.5874	0	0	;
/*	795	*/	5	24	24	0	1	-2	3	1	0	0	0	1	0	5.72259	1	0	22	877.604	8.13271	0	0	;
/*	796	*/	5	24	24	0	1	-2	3	0	1	0	0	1	0	7.05313	1	0	22	880.758	5.66093	0	0	;
/*	797	*/	20	41	41	0	1	-17	2	0	1	0	0	1	0	13.7208	1	0	20	903.555	8.41489	0	0	;
/*	798	*/	20	43	43	0	1	-19	2	0	1	0	0	1	0	13.7208	0	0	20	916.171	7.94058	0	0	;
/*	799	*/	6	28	28	0	1	-5	2	0	1	0	0	1	0	7.6283	1	0	12	544.694	13.5829	0	0	;
/*	800	*/	6	8	12	1	1	-3	3	1	0	0	0	1	0	16.6412	1	0	10	528.789	12.0263	0	0	;
/*	801	*/	6	28	28	0	1	-5	3	0	1	0	0	1	0	11.6126	1	0	18	621.262	9.98737	0	0	;
/*	802	*/	6	28	28	0	1	-5	3	0	1	0	0	1	0	11.6126	1	0	17	610.244	7.74429	0	0	;
/*	803	*/	20	40	40	0	1	-17	2	0	1	0	0	1	0	5.88528	1	0	17	599.442	9.02389	0	0	;
/*	804	*/	6	8	12	1	1	-5	1	1	0	0	0	1	0	16.7238	0	0	13	577.726	9.06016	0	0	;
/*	805	*/	8	12	16	1	1	-7	1	1	0	0	0	1	0	5.88528	1	0	17	596.799	7.92453	0	0	;
/*	806	*/	8	12	16	1	1	-7	1	1	0	0	0	1	0	6.2591	1	0	16	592.877	10.2705	0	0	;
/*	807	*/	8	16	20	1	1	-7	1	1	0	0	0	1	0	5.93507	1	0	12	554.047	12.9637	0	0	;
/*	808	*/	12	34	34	0	1	-9	2	0	0	1	0	1	0	9.18196	1	0	12	562.596	8.60195	0	0	;
/*	809	*/	12	16	20	1	1	-11	1	1	0	0	0	1	0	5.93507	1	0	12	552.141	11.5551	0	0	;
/*	810	*/	20	41	41	0	1	-17	2	1	0	0	0	1	0	5.08437	1	0	32	831.773	15.193	0	0	;
/*	811	*/	20	43	43	0	1	-19	2	0	0	1	0	1	0	5.08437	1	0	33	832.263	18.0382	0	0	;
/*	812	*/	5	24	27	1	1	-4	1	1	0	0	0	1	0	5.96742	0	0	30	807.697	21.2024	0	0	;
/*	813	*/	20	43	43	0	1	-17	3	0	0	1	0	1	0	12.9379	0	1	14	728.594	7.69871	0	0	;
/*	814	*/	20	42	42	0	1	-19	3	0	0	1	0	1	0	12.9379	0	0	14	741.131	17.1352	0	0	;
/*	815	*/	20	43	43	0	1	-19	2	0	0	0	0	1	0	4.75769	0	1	35	770.953	12.2924	0	0	;
/*	816	*/	9	32	32	0	1	-8	2	1	0	0	0	1	0	11.6393	0	0	27	773.938	12.6869	0	0	;
/*	817	*/	9	32	32	0	1	-8	3	0	0	1	0	1	0	5.83208	1	0	30	772.988	20.6945	0	0	;
/*	818	*/	9	30	30	0	1	-6	2	0	0	1	0	1	0	15.0051	1	0	29	759.448	16.3599	0	0	;
/*	819	*/	5	30	30	0	1	-4	2	1	0	0	0	1	0	5.83208	1	0	32	768.065	17.937	0	0	;
/*	820	*/	24	47	47	0	1	-23	3	0	0	1	0	1	0	9.28429	1	0	29	782.227	21.5089	0	0	;
/*	821	*/	5	27	27	0	1	-2	2	0	0	1	0	1	0	3.38872	1	0	33	775.715	18.5867	0	0	;
/*	822	*/	9	11	12	1	1	-8	1	1	0	0	0	1	0	3.38872	1	0	36	772.327	15.5359	0	0	;
/*	823	*/	5	30	30	0	1	-4	2	0	0	1	0	1	0	4.68165	0	0	29	802.603	20.4294	0	0	;
/*	824	*/	16	41	41	0	1	-15	2	0	0	1	0	1	0	9.65255	1	0	27	864.742	16.2157	0	0	;
/*	825	*/	5	9	12	1	1	-4	1	1	0	0	0	1	0	4.74121	0	0	29	806.874	20.2495	0	0	;
/*	826	*/	5	24	24	0	1	0	3	0	0	1	0	1	0	8.31574	0	0	29	798.948	19.2832	0	0	;
/*	827	*/	24	34	37	1	1	-20	2	0	0	1	0	1	0	12.0483	0	1	31	787.839	13.2278	0	0	;
/*	828	*/	9	34	37	1	1	-8	2	0	0	1	0	1	0	10.5877	1	0	30	814.018	10.1151	0	0	;
/*	829	*/	9	20	24	1	1	-8	2	1	0	0	0	1	0	4.68165	1	0	29	801.746	16.6591	0	0	;
/*	830	*/	16	32	32	0	1	-13	2	0	0	1	0	1	0	10.1652	0	1	32	838.527	10.5971	0	0	;
/*	831	*/	24	46	46	0	1	-20	2	0	1	0	0	1	0	10.1652	1	0	32	829.874	12.9	0	0	;
/*	832	*/	5	29	29	0	1	-4	2	1	0	0	0	1	0	3.53014	1	0	34	818.653	16.7547	0	0	;
/*	833	*/	5	20	24	1	1	-4	3	0	0	1	0	1	0	7.16477	1	0	33	813.558	15.6073	0	0	;
/*	834	*/	5	9	12	1	1	-2	3	1	0	0	0	1	0	11.076	0	1	34	811.534	6.10471	0	0	;
/*	835	*/	5	25	25	0	1	0	3	0	0	1	0	1	0	3.53014	1	0	34	821.905	20.192	0	0	;
/*	836	*/	9	32	32	0	1	-8	2	0	1	0	0	1	0	4.70684	1	0	27	864.95	4.06	0	0	;
/*	837	*/	20	43	43	0	1	-17	2	0	0	1	0	1	0	4.70684	1	0	29	860.614	5.5061	0	0	;
/*	838	*/	20	40	40	0	1	-15	3	0	0	1	0	1	0	5.95894	1	0	31	883.161	8.37029	0	0	;
/*	839	*/	20	43	43	0	1	-19	1	1	0	0	0	1	0	12.6216	1	0	28	858.454	16.8866	0	0	;
/*	840	*/	9	24	27	1	1	-8	3	0	0	1	0	1	0	6.38533	1	0	31	884.601	4.79318	0	0	;
/*	841	*/	23	46	46	0	1	-23	2	0	1	0	0	1	0	10.171	1	0	29	678.163	19.498	0	0	;
/*	842	*/	20	40	40	0	1	-19	1	1	0	0	0	1	0	6.68635	0	0	27	671.012	25.1484	0	0	;
/*	843	*/	5	27	27	0	1	-2	3	0	0	1	0	1	0	12.1941	1	0	27	665.544	14.9336	0	0	;
/*	844	*/	5	16	20	1	1	-2	2	1	0	0	0	1	0	6.68635	0	0	27	666.232	24.9843	0	0	;
/*	845	*/	5	9	12	1	1	-4	3	1	0	0	0	1	0	9.04358	0	0	28	658.967	27.4947	0	0	;
/*	846	*/	5	30	30	0	1	-4	3	1	0	0	0	1	0	9.04358	1	0	26	650.367	20.6953	0	0	;
/*	847	*/	20	24	27	1	1	-19	1	1	0	0	0	1	0	9.19348	1	0	26	657.322	18.6265	0	0	;
/*	848	*/	19	43	43	0	1	-19	2	0	0	1	0	1	0	8.14802	1	0	35	680.941	25.2323	0	0	;
/*	849	*/	9	31	31	0	1	-8	2	0	0	1	0	1	0	8.14802	1	0	39	688.651	19.6108	0	0	;
/*	850	*/	24	46	46	0	1	-21	2	0	0	1	0	1	0	13.1802	1	0	45	740.804	6.59521	0	0	;
/*	851	*/	5	24	24	0	1	-2	2	1	0	0	0	1	0	14.8205	1	0	39	753.334	9.25713	0	0	;
/*	852	*/	5	30	30	0	1	-2	3	0	0	1	0	1	0	4.59073	1	0	43	738.7	18.824	0	0	;
/*	853	*/	5	34	34	0	1	-4	1	1	0	0	0	1	0	5.71157	0	0	43	702.116	22.0483	0	0	;
/*	854	*/	20	40	40	0	1	-19	2	0	0	1	0	1	0	13.946	0	0	44	714.738	15.9823	0	0	;
/*	855	*/	20	32	32	0	1	-17	2	0	0	1	0	1	0	8.21898	1	0	43	701.222	11.4953	0	0	;
/*	856	*/	20	40	40	0	1	-17	3	0	0	1	0	1	0	11.4192	0	0	36	675.996	19.9959	0	0	;
/*	857	*/	24	40	40	0	1	-20	2	0	0	1	0	1	0	12.2367	1	0	40	702.003	6.28707	0	0	;
/*	858	*/	16	40	40	0	1	-15	2	0	0	1	0	1	0	11.9778	1	0	42	711.092	8.42571	0	0	;
/*	859	*/	16	20	24	1	1	-13	1	0	0	1	0	1	0	13.5381	1	0	43	720.046	16.6035	0	0	;
/*	860	*/	5	9	12	1	1	-4	2	1	0	0	0	1	0	5.01846	1	0	37	932.458	23.0519	0	0	;
/*	861	*/	9	32	32	0	1	-6	2	0	0	1	0	1	0	5.01846	1	0	37	936.314	23.5489	0	0	;
/*	862	*/	20	43	43	0	1	-19	1	0	0	1	0	1	0	20.2925	1	0	51	966.793	7.27154	0	0	;
/*	863	*/	12	16	20	1	1	-11	1	1	0	0	0	1	0	6.64096	0	0	42	964.834	19.5801	0	0	;
/*	864	*/	5	9	12	1	1	-4	2	1	0	0	0	1	0	12.213	1	0	42	1119.09	5.93	0	0	;
/*	865	*/	5	16	20	1	1	-2	3	0	0	1	0	1	0	6.29369	0	0	37	1098.68	21.0935	0	0	;
/*	866	*/	5	27	27	0	1	-2	2	1	0	0	0	1	0	8.59803	1	0	48	1086.94	9.77615	0	0	;
/*	867	*/	5	27	27	0	1	-2	3	1	0	0	0	1	0	8.59803	1	0	49	1079.58	10.3339	0	0	;
/*	868	*/	5	29	29	0	1	-4	2	0	0	1	0	1	0	3.32552	1	0	39	1076.18	21.4919	0	0	;
/*	869	*/	5	9	12	1	1	0	3	1	0	0	0	1	0	13.4511	1	0	53	1071.31	5.90094	0	0	;
/*	870	*/	5	34	35	1	1	-4	3	1	0	0	0	1	0	13.8859	1	0	57	1060.21	4.57552	0	0	;
/*	871	*/	5	16	20	1	1	-2	3	1	0	0	0	1	0	3.89297	1	0	46	1061.56	19.6438	0	0	;
/*	872	*/	5	9	12	1	1	-2	2	1	0	0	0	1	0	5.6665	1	0	55	1045.18	10.7428	0	0	;
/*	873	*/	5	9	12	1	1	-2	3	1	0	0	0	1	0	8.47035	0	0	41	1025.75	21.4056	0	0	;
/*	874	*/	5	9	12	1	1	-2	2	1	0	0	0	1	0	8.45642	1	0	59	1037.22	4.02302	0	0	;
/*	875	*/	9	30	32	1	1	-6	3	1	0	0	0	1	0	9.26637	1	0	55	1006.86	5.101	0	0	;
/*	876	*/	9	16	20	1	1	-6	2	0	0	1	0	1	0	10.1819	0	0	41	1008.79	20.1177	0	0	;
/*	877	*/	9	32	32	0	1	-6	2	0	0	1	0	1	0	8.47035	0	0	44	1032.63	21.0904	0	0	;
/*	878	*/	9	11	12	1	1	-8	1	1	0	0	0	1	0	8.45642	1	0	53	1035.55	11.8602	0	0	;
/*	879	*/	9	11	12	1	1	-8	1	1	0	0	0	1	0	3.40221	1	0	46	1043.5	19.4498	0	0	;
/*	880	*/	9	20	24	1	1	-8	2	0	0	1	0	1	0	3.40221	1	0	44	1040.63	22.2259	0	0	;
/*	881	*/	9	11	12	1	1	-8	1	1	0	0	0	1	0	6.66428	1	0	44	1051.68	22.5323	0	0	;
/*	882	*/	9	32	32	0	1	-6	2	0	0	1	0	1	0	3.89297	1	0	45	1057.68	21.8803	0	0	;
/*	883	*/	9	23	27	1	1	-6	2	1	0	0	0	1	0	3.32552	1	0	40	1079.25	20.7839	0	0	;
/*	884	*/	9	16	20	1	1	-4	3	1	0	0	0	1	0	2.45732	1	0	38	1092.36	20.9822	0	0	;
/*	885	*/	9	24	27	1	1	-4	3	1	0	0	0	1	0	10.5737	1	0	34	1113.41	19.3282	0	0	;
/*	886	*/	9	34	34	0	1	-4	3	1	0	0	0	1	0	12.1424	1	0	30	1122.88	20.1447	0	0	;
/*	887	*/	20	43	43	0	1	-19	3	0	0	1	0	1	0	6.76377	0	0	42	1039.16	15.9084	0	0	;
/*	888	*/	20	46	46	0	1	-17	3	0	0	1	0	1	0	4.01774	1	0	51	1045.44	15.4363	0	0	;
/*	889	*/	12	37	37	0	1	-9	2	1	0	0	0	1	0	12.2615	1	0	31	1097.68	13.3648	0	0	;
/*	890	*/	12	16	20	1	1	-11	1	1	0	0	0	1	0	2.45732	0	0	37	1091.8	22.0028	0	0	;
/*	891	*/	16	20	24	1	1	-15	3	0	0	1	0	1	0	6.29369	1	0	37	1104.47	19.8158	0	0	;
/*	892	*/	16	47	47	0	1	-13	2	0	0	1	0	1	0	10.6589	1	0	28	1108.92	16.0443	0	0	;
/*	893	*/	24	48	48	0	1	-23	3	0	0	1	0	1	0	12.213	1	0	42	1107.45	7.55261	0	0	;
/*	894	*/	12	37	37	0	1	-11	3	0	0	1	0	1	0	9.35345	0	0	39	1017.67	20.8758	0	0	;
/*	895	*/	5	9	12	1	1	-2	2	1	0	0	0	1	0	14.9575	1	0	58	1025.05	4.01266	0	0	;
/*	896	*/	5	9	12	1	1	-4	2	1	0	0	0	1	0	2.76941	1	0	42	992.632	21.1612	0	0	;
/*	897	*/	5	32	32	0	1	-4	2	1	0	0	0	1	0	2.76941	0	0	42	989.866	22.8893	0	0	;
/*	898	*/	5	27	27	0	1	-2	2	1	0	0	0	1	0	5.01133	1	0	43	988.3	19.9934	0	0	;
/*	899	*/	5	16	20	1	1	-4	2	1	0	0	0	1	0	5.65622	0	0	44	982.996	21.5759	0	0	;
/*	900	*/	5	20	24	1	1	0	3	1	0	0	0	1	0	9.26637	1	0	52	997.948	8.25146	0	0	;
/*	901	*/	5	12	16	1	1	0	3	1	0	0	0	1	0	5.65751	1	0	44	978.745	21.1103	0	0	;
/*	902	*/	5	30	32	1	1	-4	3	1	0	0	0	1	0	17.328	1	0	52	987.392	4.49665	0	0	;
/*	903	*/	5	9	12	1	1	-4	2	1	0	0	0	1	0	6.64096	1	0	44	971.044	22.1493	0	0	;
/*	904	*/	16	37	37	0	1	-13	2	0	0	1	0	1	0	10.7884	1	0	37	914.146	15.7199	0	0	;
/*	905	*/	12	37	37	0	1	-7	3	0	0	1	0	1	0	6.53491	0	0	39	942.724	20.4287	0	0	;
/*	906	*/	24	43	43	0	1	-23	2	0	1	0	0	1	0	8.31945	0	0	28	846.65	23.7074	0	0	;
/*	907	*/	9	11	12	1	1	-8	1	1	0	0	0	1	0	2.78935	0	0	42	696.944	21.2586	0	0	;
/*	908	*/	12	32	32	0	1	-9	2	0	0	1	0	0	0	3.8905	1	0	16	690.44	11.046	0	0	;
/*	909	*/	5	27	27	0	1	-4	1	1	0	0	0	0	0	3.8905	1	0	15	688.947	10.7456	0	0	;
/*	910	*/	12	34	34	0	1	-11	3	0	0	1	0	0	0	1.08975	1	0	18	687.287	10.9343	0	0	;
/*	911	*/	5	28	28	0	1	-3	3	0	0	1	0	0	0	3.50471	1	0	18	685.57	11.6465	0	0	;
/*	912	*/	5	27	27	0	1	-3	2	0	0	1	0	0	0	1.08975	1	0	19	688.29	10.1074	0	0	;
/*	913	*/	24	37	37	0	1	-4	1	0	0	1	0	0	0	12.4261	1	0	15	694.753	12.6342	0	0	;
/*	914	*/	24	37	37	0	1	-13	2	0	0	1	0	0	0	5.20482	1	0	14	681.457	12.4381	0	0	;
/*	915	*/	5	28	30	1	1	0	3	0	1	0	0	1	0	24.5289	1	0	22	612.423	10.4283	0	0	;
/*	916	*/	5	28	28	0	1	-4	2	0	1	0	0	1	0	24.6529	1	0	20	633.787	10.3112	0	0	;
/*	917	*/	31	50	50	0	1	-29	2	0	0	1	0	1	0	9.65255	0	0	28	873.818	22.0472	0	0	;
/*	918	*/	5	26	26	0	1	-2	2	0	0	1	0	1	0	5.95894	1	0	30	883.569	11.956	0	0	;
/*	919	*/	5	32	32	0	1	-4	3	1	0	0	0	1	0	21.5774	1	0	32	893.252	17.2133	0	0	;
/*	920	*/	5	29	29	0	1	-4	2	0	0	1	0	1	0	20.414	1	0	33	897.584	15.3547	0	0	;
/*	921	*/	19	46	46	0	1	-19	2	0	0	1	0	1	0	15.4034	1	0	32	877.212	16.7295	0	0	;
/*	922	*/	5	16	20	1	1	-4	1	1	0	0	0	1	0	5.75224	1	0	33	910.512	17.2059	0	0	;
/*	923	*/	5	27	27	0	1	-2	2	0	1	0	0	1	0	5.44047	0	0	35	913.314	23.296	0	0	;
/*	924	*/	5	9	13	1	1	-4	1	1	0	0	0	1	0	8.88282	0	0	34	916.087	25.1722	0	0	;
/*	925	*/	5	27	27	0	1	-4	2	0	0	1	0	1	0	5.48358	1	0	33	903.124	15.0697	0	0	;
/*	926	*/	20	43	43	0	1	-17	3	1	0	0	0	1	0	5.44047	1	0	33	908.127	18.0501	0	0	;
/*	927	*/	24	50	50	0	1	-23	2	0	0	1	0	1	0	6.92821	0	0	36	924.033	15.5088	0	0	;
/*	928	*/	9	34	34	0	1	-8	2	0	0	1	0	1	0	6.92821	0	0	34	921.949	17.9337	0	0	;
/*	929	*/	9	11	12	1	1	-6	2	1	0	0	0	1	0	17.1405	1	0	29	945.905	7.26301	0	0	;
/*	930	*/	9	10	12	1	1	-8	1	0	0	1	0	1	0	36.7407	1	0	23	955.156	17.1926	0	0	;
/*	931	*/	20	43	43	0	1	-19	2	1	0	1	0	1	0	36.7407	1	0	23	955.156	17.1926	0	0	;
/*	932	*/	9	11	12	1	1	-8	2	1	0	0	0	1	0	11.4647	1	0	26	925.063	8.92016	0	0	;
/*	933	*/	16	34	34	0	1	-13	2	0	0	1	0	1	0	11.4647	0	1	26	916.47	5.94702	0	0	;
/*	934	*/	20	46	46	0	1	-23	2	0	0	1	0	1	0	17.1405	1	0	27	958.95	4	0	0	;
/*	935	*/	5	24	27	1	1	-4	1	1	0	0	0	1	0	23.8307	1	0	20	988.429	19.1398	0	0	;
/*	936	*/	24	43	44	1	1	-23	2	0	0	1	0	1	0	6.10514	0	0	23	1002.55	17.8054	0	0	;
/*	937	*/	24	43	43	0	1	-18	3	0	0	0	0	1	0	6.10514	0	0	22	1003.02	13.0621	0	0	;
/*	938	*/	20	49	50	1	1	-19	2	1	0	0	0	1	0	7.18864	0	0	23	998.773	14.1306	0	0	;
/*	939	*/	20	24	27	1	1	-19	3	1	0	0	0	1	0	9.36206	1	0	22	993.31	13.7253	0	0	;
/*	940	*/	9	34	34	0	1	-8	2	1	0	0	0	1	0	14.0413	1	0	30	960.993	3.81	0	0	;
/*	941	*/	9	20	24	1	1	-8	2	1	0	0	0	1	0	8.76832	1	0	28	973.274	6.37659	0	0	;
/*	942	*/	20	41	41	0	1	-19	2	0	0	1	0	1	0	5.66232	1	0	25	978.794	9.53292	0	0	;
/*	943	*/	24	43	43	0	1	-24	2	0	0	1	0	1	0	9.12909	1	0	23	1023.93	7.2833	0	0	;
/*	944	*/	16	18	20	1	1	-15	2	0	0	1	0	1	0	6.1976	1	0	18	998.702	8.56601	0	0	;
/*	945	*/	9	11	12	1	1	-8	1	1	0	0	0	1	0	6.1976	1	0	19	992.796	9.56447	0	0	;
/*	946	*/	9	11	12	1	1	-8	1	1	0	0	0	1	0	5.66232	1	0	28	974.077	9.68139	0	0	;
/*	947	*/	12	30	30	0	1	-7	3	0	0	1	0	1	0	9.5426	1	0	15	1002.71	9.0887	0	0	;
/*	948	*/	20	40	40	0	1	-17	3	0	0	1	0	1	0	13.2301	1	0	30	960.111	8.53853	0	0	;
/*	949	*/	24	43	43	0	1	-18	3	0	1	0	0	1	0	9.12909	1	0	20	1015.74	6.35661	0	0	;
/*	950	*/	24	43	43	0	1	-22	2	0	0	1	0	1	0	13.9269	1	0	27	1077	10.4627	0	0	;
/*	951	*/	9	11	12	1	1	-8	1	1	0	0	0	1	0	19.8519	1	0	24	1040.48	6.79006	0	0	;
/*	952	*/	6	9	12	1	1	-5	3	1	0	0	0	1	0	3.41068	1	0	20	1297.13	5.66708	0	0	;
/*	953	*/	6	24	24	0	1	1	3	0	0	1	0	1	0	6.8608	1	0	21	1289.63	7.79317	0	0	;
/*	954	*/	6	27	27	0	1	-3	2	0	0	1	0	1	0	7.77739	1	0	22	1283.15	7.67803	0	0	;
/*	955	*/	9	11	12	1	1	-8	2	1	0	0	0	1	0	13.7265	0	0	22	1269.59	9.96933	0	0	;
/*	956	*/	15	41	41	0	1	-15	2	1	0	0	0	1	0	10.3345	1	0	20	1234.15	7.38056	0	0	;
/*	957	*/	24	43	43	0	1	-18	3	0	0	1	0	1	0	18.4475	0	0	21	1251.06	10.4189	0	0	;
/*	958	*/	9	11	12	1	1	-4	3	1	0	0	0	1	0	10.3345	1	0	20	1224.27	2.32	0	0	;
/*	959	*/	12	24	27	1	1	-11	1	1	0	0	0	1	0	3.22339	1	0	26	1087.78	3.93	0	0	;
/*	960	*/	12	24	27	1	1	-11	1	1	0	0	0	1	0	1.83778	0	0	26	1088.4	11.528	0	0	;
/*	961	*/	12	37	37	0	1	-9	2	1	0	0	0	1	0	9.08981	1	0	26	1104.23	5.97	0	0	;
/*	962	*/	12	37	37	0	1	-11	3	0	1	0	0	1	0	3.46823	1	0	25	1111.8	9.33701	0	0	;
/*	963	*/	6	27	27	0	1	-1	3	1	0	0	0	1	0	3.01998	1	0	25	1108.63	11.1037	0	0	;
/*	964	*/	6	28	28	0	1	-3	3	0	0	1	0	1	0	3.26541	0	0	26	1098.37	9.76454	0	0	;
/*	965	*/	6	30	30	0	1	-5	3	0	0	1	0	1	0	3.26541	0	0	26	1096.81	11.3601	0	0	;
/*	966	*/	6	20	24	1	1	-5	2	0	0	1	0	1	0	1.83778	1	0	26	1089.03	10.2298	0	0	;
/*	967	*/	9	30	30	0	1	-4	3	1	0	0	0	1	0	4.10593	1	0	26	1095.61	5.72271	0	0	;
/*	968	*/	28	46	46	0	1	-25	2	0	1	0	0	1	0	3.22339	1	0	26	1087.91	8.95611	0	0	;
/*	969	*/	16	41	41	0	1	-15	2	0	1	0	0	1	0	3.01998	1	0	25	1106.29	11.4688	0	0	;
/*	970	*/	24	50	50	0	1	-23	1	0	0	1	0	1	0	11.6139	1	0	33	1157.98	10.7176	0	0	;
/*	971	*/	9	32	32	0	1	-8	2	0	0	1	0	1	0	6.20795	0	0	32	1148.42	10.5077	0	0	;
/*	972	*/	9	32	32	0	1	-8	2	1	0	0	0	1	0	4.17421	1	0	28	1120.57	10.6824	0	0	;
/*	973	*/	6	9	12	1	1	-5	1	1	0	0	0	1	0	3.67901	1	0	30	1143.25	7.51725	0	0	;
/*	974	*/	6	27	27	0	1	-3	2	0	0	1	0	1	0	4.05046	1	0	30	1134.92	7.55326	0	0	;
/*	975	*/	6	32	32	0	1	-5	2	0	0	1	0	1	0	4.17421	1	0	29	1124.75	8.39626	0	0	;
/*	976	*/	20	41	41	0	1	-19	2	0	0	1	0	1	0	4.05046	0	0	30	1133.54	10.9189	0	0	;
/*	977	*/	20	41	41	0	1	-19	1	0	0	1	0	1	0	2.66343	0	0	31	1143.24	10.5702	0	0	;
/*	978	*/	20	41	41	0	1	-19	3	0	0	1	0	1	0	7.6878	1	0	32	1168.79	8.49834	0	0	;
/*	979	*/	24	43	43	0	1	-18	3	0	0	1	0	1	0	7.6878	0	0	31	1172.37	9.72881	0	0	;
/*	980	*/	6	16	20	1	1	-1	3	1	0	0	0	1	0	3.67901	1	0	25	1214.53	4.35948	0	0	;
/*	981	*/	6	9	12	1	1	-5	1	1	0	0	0	1	0	5.97571	1	0	24	1208.85	7.17606	0	0	;
/*	982	*/	6	16	20	1	1	-1	3	1	0	0	0	1	0	5.97571	1	0	24	1202.94	4.73622	0	0	;
/*	983	*/	16	47	47	0	1	-13	2	0	0	1	0	1	0	3.67901	1	0	25	1215.21	6.32693	0	0	;
/*	984	*/	12	37	37	0	1	-10	2	1	0	0	0	1	0	5.23448	0	0	24	1206.06	9.9191	0	0	;
/*	985	*/	9	11	12	1	1	-8	1	1	0	0	0	1	0	5.23448	1	0	25	1205.15	8.64915	0	0	;
/*	986	*/	24	43	43	0	1	-20	2	0	0	1	0	1	0	7.25377	1	0	24	1198.35	7.92995	0	0	;
/*	987	*/	28	46	46	0	1	-28	2	0	0	1	0	1	0	10.9187	1	0	21	1224.22	8.59163	0	0	;
/*	988	*/	9	11	12	1	1	-8	1	1	0	0	0	1	0	3.41068	0	0	20	1294.66	8.98086	0	0	;
/*	989	*/	27	30	31	1	1	-30	1	1	0	0	0	1	0	5.98746	1	0	18	1317.58	7.40135	0	0	;
/*	990	*/	12	37	37	0	1	-11	1	0	0	1	0	1	0	5.98746	1	0	17	1321.87	8.32896	0	0	;
/*	991	*/	24	46	46	0	1	-23	2	1	0	0	0	1	0	5.877	0	0	17	1333.98	10.1561	0	0	;
/*	992	*/	9	32	32	0	1	-8	2	0	0	1	0	1	0	8.75124	0	0	21	1386.46	8.29089	0	0	;
/*	993	*/	9	11	12	1	1	-8	1	1	0	0	0	1	0	6.21287	1	0	21	1353.5	9.26354	0	0	;
/*	994	*/	9	11	12	1	1	-8	2	1	0	0	0	1	0	5.877	0	0	17	1329.23	10.0718	0	0	;
/*	995	*/	6	27	27	0	1	-3	2	0	0	1	0	1	0	6.21287	1	0	18	1349.11	7.64044	0	0	;
/*	996	*/	6	32	32	0	1	-5	2	0	0	1	0	1	0	5.90921	1	0	21	1372.75	8.12966	0	0	;
/*	997	*/	6	9	12	1	1	-5	2	1	0	0	0	1	0	6.77784	1	0	20	1368.36	6.28491	0	0	;
/*	998	*/	6	30	30	0	1	-5	2	0	0	1	0	1	0	5.90921	1	0	21	1378.24	6.86321	0	0	;
/*	999	*/	6	24	24	0	1	-3	2	0	0	1	0	1	0	8.75124	1	0	20	1395.11	9.87551	0	0	;
/*	1000	*/	6	9	12	1	1	-5	3	1	0	0	0	1	0	2.66343	0	0	30	1140.73	10.9979	0	0	;
/*	1001	*/	6	28	28	0	1	-3	3	0	1	0	0	1	0	4.05513	1	0	21	1255.44	8.25459	0	0	;
/*	1002	*/	9	32	32	0	1	-6	3	0	1	0	0	1	0	4.05513	1	0	21	1255.76	6.15532	0	0	;
/*	1003	*/	6	32	32	0	1	-5	3	0	1	0	0	1	0	7.37195	1	0	17	1275.65	7.89788	0	0	;
/*	1004	*/	9	30	30	0	1	-8	2	0	1	0	0	1	0	4.25759	0	0	16	1436.08	12.1365	0	0	;
/*	1005	*/	12	37	37	0	1	-11	2	0	0	1	0	1	0	4.25759	0	0	16	1433.9	11.9313	0	0	;
/*	1006	*/	16	31	32	1	1	-15	1	0	0	1	0	1	0	6.97295	0	0	17	1427.12	12.2913	0	0	;
/*	1007	*/	20	40	40	0	1	-17	2	0	0	1	0	1	0	7.30148	1	0	18	1421.25	13.7961	0	0	;
/*	1008	*/	6	30	30	0	1	-3	2	0	0	1	0	1	0	6.97295	1	0	18	1420.79	12.9919	0	0	;
/*	1009	*/	20	43	43	0	1	-19	2	0	0	1	0	1	0	9.31605	1	0	19	1407.1	6.83218	0	0	;
/*	1010	*/	24	43	43	0	1	-23	2	0	1	0	0	1	0	9.31605	1	0	18	1405.95	5.55588	0	0	;
/*	1011	*/	16	43	46	1	1	-15	2	0	0	1	0	1	0	6.7956	1	0	17	1394.04	5.34775	0	0	;
/*	1012	*/	16	20	24	1	1	-15	1	0	1	0	0	1	0	13.7217	1	0	17	1384.64	7.01562	0	0	;
/*	1013	*/	12	20	24	1	1	-11	1	1	0	0	0	1	0	6.7956	1	0	18	1392.83	8.10673	0	0	;
/*	1014	*/	6	28	28	0	1	-3	2	0	1	0	0	1	0	9.89107	1	0	12	1371.58	8.53731	0	0	;
/*	1015	*/	6	27	27	0	1	-1	3	0	1	0	0	1	0	12.2604	1	0	14	1372.45	5.07365	0	0	;
/*	1016	*/	12	28	28	0	1	17	3	1	0	0	0	1	0	9.89107	1	0	12	1364.39	6.07434	0	0	;
/*	1017	*/	16	37	37	0	1	-13	2	0	1	0	0	1	0	10.7668	1	0	13	1360.08	7.13896	0	0	;
/*	1018	*/	9	11	12	1	1	-8	1	1	0	0	0	1	0	2.11422	1	0	14	1341.07	9.45387	0	0	;
/*	1019	*/	9	30	30	0	1	-6	3	0	1	0	0	1	0	2.11422	1	0	14	1341.57	8.58601	0	0	;
/*	1020	*/	24	46	46	0	1	-20	3	0	1	0	0	1	0	4.23252	1	0	14	1294.76	9.47726	0	0	;
/*	1021	*/	6	30	30	0	1	-3	2	0	1	0	0	1	0	4.23252	1	0	14	1291.04	8.37815	0	0	;
/*	1022	*/	6	30	30	0	1	-5	2	0	1	0	0	1	0	6.41254	1	0	13	1299.39	8.97371	0	0	;
/*	1023	*/	6	20	24	1	1	-5	1	1	0	0	0	1	0	9.67696	1	0	12	1302.9	6.00295	0	0	;
/*	1024	*/	6	24	24	0	1	-3	2	0	1	0	0	1	0	11.308	1	0	13	1308.42	7.91676	0	0	;
/*	1025	*/	24	46	46	0	1	-20	2	0	1	0	0	1	0	16.854	1	0	13	1318.75	10.0483	0	0	;
/*	1026	*/	12	37	37	0	1	-11	3	0	1	0	0	1	0	7.37195	1	0	17	1272.69	5.64883	0	0	;
/*	1027	*/	12	32	32	0	1	-9	2	1	0	0	0	1	0	8.31426	1	0	24	1235.96	9.06511	0	0	;
/*	1028	*/	12	30	32	1	1	-9	2	0	1	0	0	1	0	8.31426	1	0	23	1232.94	6.35524	0	0	;
/*	1029	*/	6	30	30	0	1	-5	3	1	0	0	0	1	0	5.88282	1	0	21	1221.84	15.7288	0	0	;
/*	1030	*/	6	24	24	0	1	-1	3	0	1	0	0	1	0	5.65141	1	0	21	1233.22	9.0611	0	0	;
/*	1031	*/	6	16	20	1	1	-5	1	0	1	0	0	1	0	0.615417	1	0	20	1235.8	9.55105	0	0	;
/*	1032	*/	26	55	55	0	1	-26	2	0	1	0	0	1	0	0.615417	1	0	20	1236.39	9.13721	0	0	;
/*	1033	*/	9	30	30	0	1	-8	3	0	1	0	0	1	0	5.88282	1	0	21	1227.47	11.5844	0	0	;
/*	1034	*/	28	46	46	0	1	-23	3	0	0	1	0	1	0	11.1688	1	0	19	1214.05	7.58706	0	0	;
/*	1035	*/	9	27	27	0	1	-4	3	0	1	0	0	1	0	8.64225	1	0	23	1196.27	5.62963	0	0	;
/*	1036	*/	9	37	40	1	1	-6	3	0	1	0	0	1	0	11.1688	1	0	20	1207.96	7.73142	0	0	;
/*	1037	*/	20	43	43	0	1	-17	2	0	1	0	0	1	0	8.64225	1	0	21	1201.93	8.39346	0	0	;
/*	1038	*/	31	46	46	0	1	-29	2	0	0	1	0	1	0	46.8074	1	0	16	1147.39	5.95067	0	0	;
/*	1039	*/	9	16	20	1	1	-8	2	1	0	0	0	1	0	38.2099	0	1	2	1231.7	8.61667	0	0	;
/*	1040	*/	9	11	12	1	1	-8	2	1	0	0	0	1	0	38.2099	0	1	2	1197.86	4.2076	0	0	;
/*	1041	*/	20	37	37	0	1	-17	2	1	0	0	0	1	0	91.0979	0	1	2	1059.75	7.66173	0	0	;
/*	1042	*/	20	37	37	0	1	-14	2	1	0	0	0	1	0	13.8513	0	1	7	956.474	5.54143	0	0	;
/*	1043	*/	31	49	49	0	1	-28	2	1	0	0	0	1	0	16.5786	0	1	9	912.376	9.43328	0	0	;
/*	1044	*/	20	43	43	0	1	-18	2	1	0	0	0	1	0	20.2779	0	1	6	987.836	4.78017	0	0	;
/*	1045	*/	20	43	43	0	1	-19	2	1	0	0	0	1	0	13.8513	0	1	6	970.312	6.37485	0	0	;
/*	1046	*/	12	27	27	0	1	-7	3	1	0	0	0	1	0	20.225	0	1	7	931.752	4.53454	0	0	;
/*	1047	*/	20	43	43	0	1	-19	2	1	0	0	0	1	0	15.7571	0	1	9	898.591	9.45297	0	0	;
/*	1048	*/	20	49	50	1	1	-19	2	1	0	0	0	1	0	15.7571	1	0	20	885.308	9.19163	0	0	;
/*	1049	*/	6	9	16	1	1	-3	2	1	0	0	0	1	0	4.7543	1	0	36	1105.44	10.1922	0	0	;
/*	1050	*/	12	34	34	0	1	-9	2	0	0	1	0	1	0	9.04047	0	0	39	1167.8	13.3747	0	0	;
/*	1051	*/	12	23	27	1	1	-10	2	1	0	0	0	1	0	9.04047	1	0	33	1167.92	6.01711	0	0	;
/*	1052	*/	12	14	16	1	1	-11	1	1	0	0	0	1	0	12.2957	1	0	48	1124.43	4.67	0	0	;
/*	1053	*/	12	14	16	1	1	-11	1	1	0	0	0	1	0	12.2957	1	0	51	1115.26	4.42618	0	0	;
/*	1054	*/	12	37	37	0	1	-9	2	0	0	1	0	1	0	13.1182	1	0	38	1157.78	5.32076	0	0	;
/*	1055	*/	6	27	27	0	1	-1	3	0	1	0	0	1	0	7.53651	0	0	37	1115.05	10.434	0	0	;
/*	1056	*/	6	32	32	0	1	-3	2	0	1	0	0	1	0	8.0995	1	0	36	1146.36	4.12455	0	0	;
/*	1057	*/	20	37	37	0	1	-17	2	0	1	0	0	1	0	4.43896	0	0	42	1141.49	12.2234	0	0	;
/*	1058	*/	9	12	16	1	1	-8	2	1	0	0	0	1	0	4.43896	0	0	43	1139.33	12.7918	0	0	;
/*	1059	*/	9	11	12	1	1	-8	2	1	0	0	0	1	0	11.1296	0	0	41	1131.27	14.7205	0	0	;
/*	1060	*/	9	11	12	1	1	-8	1	1	0	0	0	1	0	11.5581	0	0	39	1123.21	12.8131	0	0	;
/*	1061	*/	9	20	24	1	1	-4	3	1	0	0	0	1	0	7.53651	0	0	40	1107.58	14.4325	0	0	;
/*	1062	*/	15	37	37	0	1	-15	2	1	0	0	0	1	0	9.32275	1	0	46	1098.23	10.4056	0	0	;
/*	1063	*/	15	18	20	1	1	-15	1	1	0	0	0	1	0	10.275	0	0	39	1091.76	14.1962	0	0	;
/*	1064	*/	6	12	16	1	1	-1	3	1	0	0	0	1	0	9.27597	1	0	32	1103.09	4.314	0	0	;
/*	1065	*/	6	12	16	1	1	-8	1	1	0	0	0	1	0	4.7543	0	0	36	1100.88	12.04	0	0	;
/*	1066	*/	9	16	20	1	1	-6	2	1	0	0	0	1	0	6.8775	0	0	35	1084.8	12.6775	0	0	;
/*	1067	*/	9	16	20	1	1	-6	2	1	0	0	0	1	0	4.6316	0	0	30	1077.16	7.49667	0	0	;
/*	1068	*/	6	8	12	1	1	-5	2	1	0	0	0	1	0	7.5747	0	0	38	1068.82	13.62	0	0	;
/*	1069	*/	6	8	12	1	1	-3	2	1	0	0	0	1	0	6.8775	0	0	34	1079.53	12.625	0	0	;
/*	1070	*/	6	8	9	1	1	-5	2	0	1	0	0	1	0	4.6316	1	0	31	1081.74	5.51971	0	0	;
/*	1071	*/	6	16	20	1	1	-5	2	1	0	0	0	1	0	6.41253	0	0	32	1043.38	9.84551	0	0	;
/*	1072	*/	6	8	12	1	1	-1	3	1	0	0	0	1	0	6.41253	0	0	33	1048.74	9.7795	0	0	;
/*	1073	*/	6	8	12	1	1	-5	4	1	0	0	0	1	0	7.39088	0	0	34	1054.62	10.2154	0	0	;
/*	1074	*/	6	16	20	1	1	-1	2	1	0	0	0	1	0	6.81505	0	0	34	1060.12	11.2686	0	0	;
/*	1075	*/	6	9	12	1	1	-5	1	1	0	0	0	1	0	6.81505	1	0	39	1061.51	15.842	0	0	;
/*	1076	*/	6	8	12	1	1	-3	2	1	0	0	0	1	0	7.9129	0	0	29	1012.34	11.8483	0	0	;
/*	1077	*/	6	8	12	1	1	-1	3	1	0	0	0	1	0	7.9129	0	0	30	1018.98	11.7069	0	0	;
/*	1078	*/	6	8	12	1	1	-5	2	1	0	0	0	1	0	1.80923	0	0	29	992.207	10.2471	0	0	;
/*	1079	*/	6	16	20	1	1	-1	3	1	0	0	0	1	0	2.57101	0	0	30	987.829	9.31475	0	0	;
/*	1080	*/	20	29	31	1	1	-19	1	1	0	0	0	1	0	2.39983	1	0	31	989.324	10.1827	0	0	;
/*	1081	*/	16	24	28	1	1	-15	2	1	0	0	0	1	0	13.2546	1	0	27	974.384	11.6665	0	0	;
/*	1082	*/	20	43	43	0	1	-19	2	0	0	1	0	1	0	16.4787	1	0	23	934.375	11.8464	0	0	;
/*	1083	*/	20	43	43	0	1	-19	2	0	0	1	0	1	0	18.2259	1	0	13	905.908	10.1551	0	0	;
/*	1084	*/	20	43	43	0	1	-19	2	0	0	1	0	1	0	94.7627	0	0	3	794.964	8.19244	0	0	;
/*	1085	*/	20	37	41	1	1	-8	1	0	0	1	0	1	0	6.224	0	0	32	995.718	12.471	0	0	;
/*	1086	*/	9	11	12	1	1	-8	1	1	0	0	0	1	0	4.22108	0	0	30	984.309	13.2345	0	0	;
/*	1087	*/	9	11	12	1	1	-8	1	1	0	0	0	1	0	25.4348	0	0	14	973.004	2.97	0	0	;
/*	1088	*/	20	43	43	0	1	-19	2	0	0	1	0	1	0	16.4787	1	0	17	921.608	12.6486	0	0	;
/*	1089	*/	24	46	46	0	1	-22	3	0	0	1	0	1	0	1.80923	1	0	29	991.7	9.10831	0	0	;
/*	1090	*/	24	53	54	1	1	-23	2	0	0	1	0	1	0	12.1941	1	0	27	673.18	16.3787	0	0	;
/*	1091	*/	9	34	34	0	1	-8	3	0	0	1	0	1	0	4.59073	1	0	42	739.719	22.131	0	0	;
/*	1092	*/	9	11	12	1	1	-8	1	1	0	0	0	1	0	4.09311	0	0	38	737.595	21.1446	0	0	;
/*	1093	*/	20	46	46	0	1	-19	2	0	0	1	0	1	0	8.53872	1	0	36	771.496	9.71247	0	0	;
/*	1094	*/	9	30	30	0	1	-4	3	0	0	1	0	1	0	9.15455	0	0	32	781.25	21.4056	0	0	;
/*	1095	*/	31	52	52	0	1	-30	2	1	0	0	0	1	0	4.09311	1	0	38	740.547	25.1309	0	0	;
/*	1096	*/	16	37	37	0	1	-13	2	0	0	1	0	1	0	10.4171	1	0	43	707.093	20.1213	0	0	;
/*	1097	*/	5	16	20	1	1	-2	3	1	0	0	0	1	0	11.2335	1	0	40	687.332	26.4075	0	0	;
/*	1098	*/	5	9	12	1	1	-4	3	1	0	0	0	1	0	2.78935	0	0	42	695.591	22.5774	0	0	;
/*	1099	*/	24	43	43	0	1	-23	1	0	0	1	0	1	0	5.88721	0	0	43	698.176	16.2331	0	0	;
/*	1100	*/	5	9	12	1	1	-2	2	1	0	0	0	1	0	4.51846	1	0	35	775.555	24.3077	0	0	;
/*	1101	*/	5	16	20	1	1	-2	3	1	0	0	0	1	0	4.51846	0	0	35	771.118	21.1726	0	0	;
/*	1102	*/	5	16	20	1	1	-2	3	1	0	0	0	1	0	5.46603	1	0	37	768.361	24.2217	0	0	;
/*	1103	*/	5	9	12	1	1	-2	3	1	0	0	0	1	0	6.31636	1	0	37	768.911	24.9953	0	0	;
/*	1104	*/	5	24	24	0	1	-2	2	1	0	0	0	1	0	4.2154	1	0	37	763.599	23.8741	0	0	;
/*	1105	*/	5	9	12	1	1	-3	2	1	0	0	0	1	0	4.2154	1	0	37	762.276	26.5076	0	0	;
/*	1106	*/	5	16	20	1	1	-4	1	1	0	0	0	1	0	4.39269	1	0	38	759.691	26.3774	0	0	;
/*	1107	*/	5	9	12	1	1	-4	2	0	0	1	0	1	0	4.11585	1	0	38	763.677	21.8102	0	0	;
/*	1108	*/	5	27	27	0	1	-2	2	0	0	1	0	1	0	4.11585	1	0	38	764.968	17.7969	0	0	;
/*	1109	*/	5	24	24	0	1	-2	2	0	0	1	0	1	0	6.60147	1	0	38	756.387	23.1892	0	0	;
/*	1110	*/	5	9	12	1	1	-2	3	1	0	0	0	1	0	4.7629	1	0	37	745.035	26.2423	0	0	;
/*	1111	*/	24	40	43	1	1	-23	1	0	0	1	0	1	0	6.34478	0	0	37	739.876	17.4254	0	0	;
/*	1112	*/	5	12	16	1	1	-4	1	1	0	0	0	1	0	10.7123	1	0	38	752.045	17.6177	0	0	;
/*	1113	*/	16	18	20	1	1	-15	2	0	0	1	0	1	0	15.8471	0	0	31	800.765	21.9654	0	0	;
/*	1114	*/	20	41	41	0	1	-19	1	0	0	1	0	1	0	14.8374	1	0	33	838.314	23.782	0	0	;
/*	1115	*/	24	43	50	1	1	-22	3	1	0	0	0	1	0	15.8471	1	0	32	816.383	25.8542	0	0	;
/*	1116	*/	20	24	28	1	1	-19	1	1	0	0	0	1	0	9.42157	0	0	29	868.654	21.1672	0	0	;
/*	1117	*/	20	40	40	0	1	-17	2	0	0	1	0	1	0	8.31945	1	0	28	853.817	20.9874	0	0	;
/*	1118	*/	24	40	40	0	1	-18	3	0	0	1	0	1	0	15.7585	1	0	31	875.643	6.67525	0	0	;
/*	1119	*/	5	27	27	0	1	-2	2	0	0	1	0	1	0	12.5674	1	0	33	886.425	9.43	0	0	;
/*	1120	*/	5	9	12	1	1	-4	3	1	0	0	0	1	0	9.42157	1	0	30	877.705	21.8989	0	0	;
/*	1121	*/	5	28	28	0	1	-4	3	1	0	0	0	1	0	4.75429	1	0	47	932.268	2.63	0	0	;
/*	1122	*/	5	27	27	0	1	-2	2	1	0	0	0	1	0	4.75429	1	0	48	927.714	4.04	0	0	;
/*	1123	*/	5	24	24	0	1	-2	2	1	0	0	0	1	0	2.54287	1	0	44	920.202	7.14246	0	0	;
/*	1124	*/	5	16	20	1	1	-2	2	1	0	0	0	1	0	3.47963	1	0	43	920.404	4.15333	0	0	;
/*	1125	*/	5	9	12	1	1	-2	2	0	0	1	0	1	0	4.86338	1	0	42	916.883	4.64896	0	0	;
/*	1126	*/	5	24	24	0	1	0	3	1	0	0	0	1	0	5.15221	1	0	41	912.247	4.08906	0	0	;
/*	1127	*/	5	27	27	0	1	0	3	0	0	1	0	1	0	3.06299	1	0	37	913.85	24.5418	0	0	;
/*	1128	*/	5	27	27	0	1	-2	2	1	0	0	0	1	0	5.42333	1	0	41	904.87	2.73	0	0	;
/*	1129	*/	31	49	49	0	1	-29	2	0	0	1	0	1	0	2.54287	1	0	46	922.685	11.2073	0	0	;
/*	1130	*/	9	11	12	1	1	-4	3	1	0	0	0	1	0	5.42333	1	0	36	899.824	3.9	0	0	;
/*	1131	*/	9	11	12	1	1	-7	2	1	0	0	0	1	0	19.3703	0	0	31	890.504	27.3126	0	0	;
/*	1132	*/	9	32	32	0	1	-8	3	0	0	1	0	1	0	3.06299	1	0	37	914.887	25.6937	0	0	;
/*	1133	*/	9	20	24	1	1	-6	2	1	0	0	0	1	0	6.08869	1	0	46	944.581	8.99467	0	0	;
/*	1134	*/	9	34	34	0	1	-4	3	1	0	0	0	1	0	6.08869	0	1	46	949.656	1.31	0	0	;
/*	1135	*/	9	24	27	1	1	-8	3	1	0	0	0	1	0	9.70843	0	0	41	951.23	25.2325	0	0	;
/*	1136	*/	5	30	30	0	1	-2	3	1	0	0	0	1	0	6.53491	1	0	38	943.254	26.7268	0	0	;
/*	1137	*/	11	34	34	0	1	-9	2	0	1	0	0	0	1	1.6393	0	0	7	227.65	3.85	0	0	;
/*	1138	*/	8	37	37	0	1	-6	3	0	1	0	0	0	1	2.48596	0	0	7	226.927	4.81	0	0	;
/*	1139	*/	21	41	41	0	1	-18	2	0	0	0	0	0	1	1.04341	0	0	7	229.51	0.93	0	0	;
/*	1140	*/	27	52	52	0	1	-25	2	0	0	0	0	0	1	1.04341	0	0	7	228.767	0.89	0	0	;
/*	1141	*/	27	48	48	0	1	-23	3	0	0	0	0	0	1	1.88333	0	0	7	227.7	5.25	0	0	;
/*	1142	*/	25	45	49	1	1	-23	2	0	1	0	0	0	1	1.33187	0	0	7	227.938	2.19	0	0	;
/*	1143	*/	42	45	49	1	1	-41	1	1	0	0	0	0	1	1.20846	0	0	7	230.114	1.21	0	0	;
